# Supplementary material
Source: publisher figshare collection journal article supplement (https://acs.figshare.com/ndownloader/files/4176832)

## **Preparation of Trifluoromethyl-Substituted Aziridines with in situ Generated $\text{CF}_3\text{CHN}_2$**

Stefan A. Küenzi, Bill Morandi and Erick M. Carreira\*  
*Laboratorium für Organische Chemie, ETH Zürich, CH-8093 Zürich, Switzerland.*  
carreira@org.chem.ethz.ch

**General.** All reactions were carried out under an atmosphere of Ar. For flash chromatography technical grade solvents were used, which were distilled prior to use. Chromatographic purification was performed as flash chromatography using Brunschwig silica 32-63, 60Å, using hexane / ethyl acetate as eluent with 0.3-0.5 bar pressure. TLC was performed on Merck silica gel 60 F254 TLC glass plates and visualized with UV light and cerium ammonium molybdate stain.  $^1\text{H}$ -NMR spectra were recorded on a VARIAN Mercury 300 MHz spectrometer in chloroform-d, all signals are reported in ppm with the internal chloroform signal at 7.26 ppm. The data is being reported as (s = singlet, d = doublet, t = triplet, m = multiplet or unresolved, br = broad signal, coupling constant(s) in Hz, integration).  $^{13}\text{C}$ -NMR spectra were recorded with  $^1\text{H}$ -decoupling on a Bruker 100 MHz spectrometer in chloroform-d, all signals are reported in ppm with the internal chloroform signal at 77.0 ppm as standard. Infrared spectra were recorded neat on a Perkin-Elmer spectrum RX-I FT-IR spectrometer. The data is reported as absorption maxima ( $\nu$ ,  $\text{cm}^{-1}$ ). Mass spectrometric measurements were performed by the mass spectrometry service of the LOC at the ETHZ on a VG-TRIBRID for electron impact ionization (EI) and on a Varian IonSpec for electron spray ionization (ESI). Chemicals were purchased from commercial suppliers and used without further purification if not noted otherwise.

**General procedure for imine condensation:**

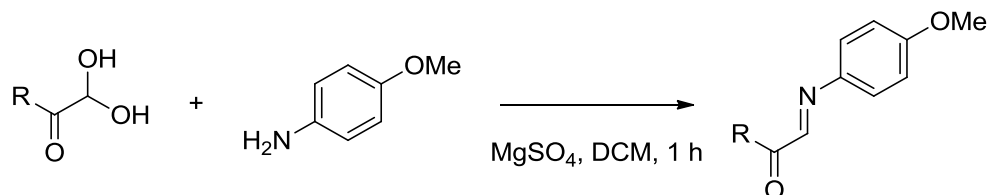

Arylglyoxals were produced according to known procedures<sup>1,2,3,4,5</sup> or purchased from commercial sources.  $\text{MgSO}_4$  (10 g) was suspended in 50 mL  $\text{CH}_2\text{Cl}_2$ . Then, the corresponding arylglyoxal monohydrate (11 mmol) and *p*-anisidine (11 mmol) were added in one portion to the stirred suspension. After 1 h the suspension was filtered, and the solvent was evaporated under reduced pressure to give the desired product (quantitative yield). The crude product was used without further purification.

**(*E*)-2-((4-methoxyphenyl)imino)-1-phenylethanone (3a)**

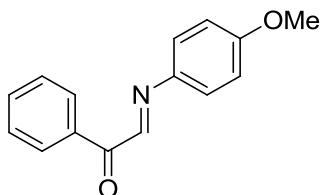

The title compound was obtained in quantitative yield as a brown solid following the general procedure for condensation.

**<sup>1</sup>H-NMR (300 MHz, CDCl<sub>3</sub>):** δ = 8.36 (s, 1H), 8.32 – 8.26 (m, 2H), 7.66 – 7.57 (m, 1H), 7.55 – 7.46 (m, 2H), 7.44 – 7.36 (m, 2H), 7.01 – 6.94 (m, 2H), 3.86 (s, 3H).

**<sup>13</sup>C-NMR (100 MHz, CDCl<sub>3</sub>):** δ = 190.9, 160.6, 154.2, 141.7, 135.5, 133.4, 130.6, 128.3, 123.5, 114.7, 55.6.

**HRMS (ESI):** calcd for C<sub>15</sub>H<sub>14</sub>NO<sub>2</sub><sup>+</sup> ([M+H]<sup>+</sup>) 240.1019, found 240.1016.

**IR (neat):** 3061, 2837, 1649, 1574, 1503, 1245, 1024, 829 cm<sup>-1</sup>.

**(*E*)-1-(4-fluorophenyl)-2-((4-methoxyphenyl)imino)ethanone (3b)**

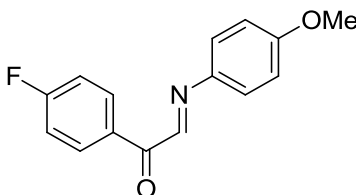

The title compound was obtained in quantitative yield as a green solid following the general procedure for condensation.

**<sup>1</sup>H-NMR (300 MHz, CDCl<sub>3</sub>):** δ = 8.43 – 8.35 (m, 2H), 8.31 (s, 1H), 7.44 – 7.36 (m, 2H), 7.22 – 7.11 (m, 2H), 7.01 – 6.92 (m, 2H), 3.86 (s, 3H).

**<sup>13</sup>C-NMR (100 MHz, CDCl<sub>3</sub>):** δ = 189.2, 166.0 (d, *J* = 255.5 Hz), 160.7, 154.1, 141.4, 133.5 (d, *J* = 9.3 Hz), 131.8 (d, *J* = 3.0 Hz), 123.6, 115.5 (d, *J* = 21.7 Hz), 114.7, 55.6.

**<sup>19</sup>F-NMR (282 MHz, CDCl<sub>3</sub>):** δ = -104.12 (m).

**HRMS (ESI):** calcd for C<sub>15</sub>H<sub>13</sub>FNO<sub>2</sub><sup>+</sup> ([M+H]<sup>+</sup>) 258.0925, found 258.0924.

**IR (neat):** 1694, 1651, 1598, 1581, 1504, 1229, 1158, 824 cm<sup>-1</sup>.

**(E)-1-(4-methoxyphenyl)-2-((4-methoxyphenyl)imino)ethanone (3c)**

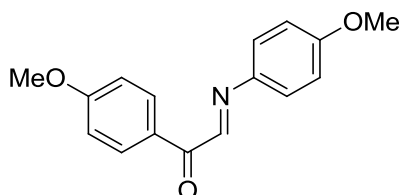

The title compound was obtained in quantitative yield as a red-brown solid following the general procedure for condensation.

**<sup>1</sup>H-NMR (300 MHz, CDCl<sub>3</sub>):**  $\delta$  = 8.39 – 8.33 (m, 2H), 8.33 (s, 1H), 7.42 – 7.35 (m, 2H), 7.02 – 6.90 (m, 4H), 3.90 (s, 3H), 3.86 (s, 3H).

**<sup>13</sup>C-NMR (100 MHz, CDCl<sub>3</sub>):**  $\delta$  = 189.0, 164.0, 160.4, 154.8, 141.9, 133.1, 128.4, 123.4, 114.6, 113.7, 55.6, 55.5.

**HRMS (ESI):** calcd for C<sub>16</sub>H<sub>16</sub>NO<sub>3</sub><sup>+</sup> ([M+H]<sup>+</sup>) 270.1125, found 270.1121.

**IR (neat):** 2935, 2838, 1648, 1596, 1504, 1244, 1021, 822 cm<sup>-1</sup>.

**(E)-ethyl 2-((4-methoxyphenyl)imino)acetate (3d)**

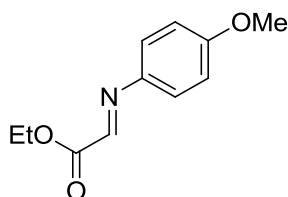

The title compound was obtained in quantitative yield as an oil following the general procedure for condensation.

**<sup>1</sup>H-NMR (300 MHz, CDCl<sub>3</sub>):**  $\delta$  = 7.93 (s, 1H), 7.40 – 7.31 (m, 2H), 6.98 – 6.86 (m, 2H), 4.41 (q,  $J$  = 7.1 Hz, 2H), 3.84 (s, 1H), 1.41 (t,  $J$  = 7.1 Hz, 3H).

**<sup>13</sup>C-NMR (100 MHz, CDCl<sub>3</sub>):**  $\delta$  = 163.6, 160.5, 148.0, 141.4, 123.6, 114.5, 61.9, 55.5, 14.2.

**HRMS (ESI):** calcd for C<sub>11</sub>H<sub>14</sub>NO<sub>3</sub><sup>+</sup> ([M+H]<sup>+</sup>) 208.0968, found 208.0973.

**IR (neat):** 2979, 2836, 1730, 1508, 1244, 1027, 831 cm<sup>-1</sup>.

**(E)-1-(3-chlorophenyl)-2-((4-methoxyphenyl)imino)ethanone (3e)**

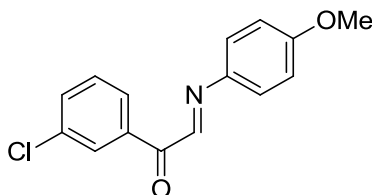

The title compound was obtained in quantitative yield as a green solid following the general procedure for condensation.

**<sup>1</sup>H-NMR (300 MHz, CDCl<sub>3</sub>):**  $\delta$  = 8.31 (s, 1H), 8.31 – 8.29 (m, 1H), 8.20 (ddd,  $J$  = 7.8, 1.6, 1.1 Hz, 1H), 7.58 (ddd,  $J$  = 8.0, 2.1, 1.1 Hz, 1H), 7.47 – 7.38 (m, 3H), 7.02 – 6.93 (m, 2H), 3.87 (s, 3H).

**<sup>13</sup>C-NMR (100 MHz, CDCl<sub>3</sub>):**  $\delta$  = 189.5, 160.9, 153.6, 141.3, 137.0, 134.5, 133.2, 130.7, 129.6, 128.8, 123.7, 114.7, 55.6.

**HRMS (ESI):** calcd for C<sub>15</sub>H<sub>13</sub>ClNO<sub>2</sub><sup>+</sup> ([M+H]<sup>+</sup>) 274.0629, found 274.0625.

**IR (neat):** 3087, 3000, 2949, 2839, 1641, 1561, 1505, 1250, 1163, 827 cm<sup>-1</sup>.

**(E)-2-((4-methoxyphenyl)imino)-1-(p-tolyl)ethanone (3f)**

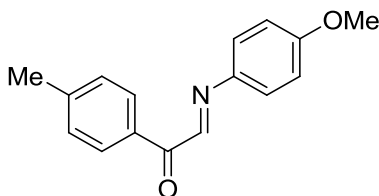

The title compound was obtained in quantitative yield as a brown solid following the general procedure for condensation.

**<sup>1</sup>H-NMR (300 MHz, CDCl<sub>3</sub>):**  $\delta$  = 8.35 (s, 1H), 8.23 – 8.18 (m, 2H), 7.44 – 7.35 (m, 2H), 7.33 – 7.27 (m, 2H), 7.01 – 6.91 (m, 2H), 3.86 (s, 3H), 2.44 (s, 3H).

**<sup>13</sup>C-NMR (100 MHz, CDCl<sub>3</sub>):**  $\delta$  = 190.4, 160.4, 154.4, 144.4, 141.8, 133.0, 130.7, 129.1, 123.5, 114.6, 55.6, 21.8.

**HRMS (EI/ESI):** calcd for C<sub>16</sub>H<sub>16</sub>NO<sub>2</sub><sup>+</sup> ([M+H]<sup>+</sup>) 254.1176, found 254.1172.

**IR (neat):** 2934, 2836, 1648, 1602, 1503, 1243, 1027, 822 cm<sup>-1</sup>.

**(E)-1-(4-bromophenyl)-2-((4-methoxyphenyl)imino)ethanone (3g)**

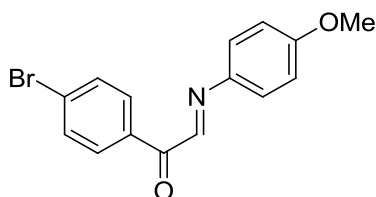

The title compound was obtained in quantitative yield as a green solid following the general procedure for condensation.

**<sup>1</sup>H-NMR (300 MHz, CDCl<sub>3</sub>):** δ = 8.30 (s, 1H), 8.25 – 8.14 (m, 2H), 7.66 – 7.60 (m, 2H), 7.44 – 7.35 (m, 2H), 7.01 – 6.92 (m, 2H), 3.86 (s, 3H).

**<sup>13</sup>C-NMR (100 MHz, CDCl<sub>3</sub>):** δ = 189.9, 160.8, 153.8, 141.3, 134.2, 132.2, 131.6, 128.7, 123.7, 114.7, 55.6.

**HRMS (ESI):** calcd for C<sub>15</sub>H<sub>13</sub>BrNO<sub>2</sub> ([M+H]<sup>+</sup>) 318.0124, found 318.0128.

**IR (neat):** 1650, 1582, 1504, 1256, 823 cm<sup>-1</sup>.

**(E)-2-((4-methoxyphenyl)imino)-1-(naphthalen-1-yl)ethanone (3h)**

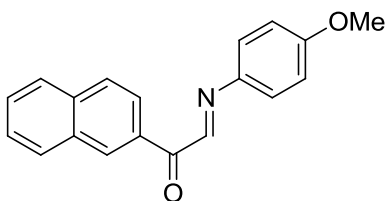

The title compound was obtained in quantitative yield as a green solid following the general procedure for condensation.

**<sup>1</sup>H-NMR (300 MHz, CDCl<sub>3</sub>):** δ = 8.98 (s, 1H), 8.46 (s, 1H), 8.26 (dd, *J* = 8.6, 1.7 Hz, 1H), 8.04 – 7.85 (m, 3H), 7.59 (dddd, *J* = 19.1, 8.2, 6.9, 1.4 Hz, 2H), 7.49 – 7.42 (m, 2H), 7.03 – 6.96 (m, 2H), 3.88 (s, 3H).

**<sup>13</sup>C-NMR (100 MHz, CDCl<sub>3</sub>):** δ = 190.6, 160.6, 154.4, 141.8, 135.8, 133.3, 132.8, 132.4, 130.0, 128.7, 128.2, 127.8, 126.7, 125.6, 123.6, 114.7, 55.6.

**HRMS (ESI):** calcd for C<sub>19</sub>H<sub>16</sub>NO<sub>2</sub><sup>+</sup> ([M+H]<sup>+</sup>) 290.1176, found 290.1169.

**IR (neat):** 3048, 1652, 1574, 1504, 1258, 811 cm<sup>-1</sup>.

**(*E*)-1-([1,1'-biphenyl]-4-yl)-2-((4-methoxyphenyl)imino)ethanone (3i)**

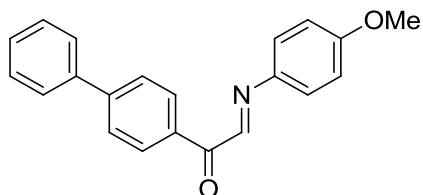

The title compound was obtained in quantitative yield as an orange solid following the general procedure for condensation.

**<sup>1</sup>H-NMR (300 MHz, CDCl<sub>3</sub>):** δ = 8.40 (s, 1H), 8.37 (s, 2H), 7.77 – 7.57 (m, 4H), 7.54 – 7.34 (m, 5H), 7.04 – 6.92 (m, 2H), 3.86 (s, 3H).

**<sup>13</sup>C-NMR (100 MHz, CDCl<sub>3</sub>):** δ = 190.4, 160.6, 154.4, 146.1, 141.7, 140.0, 134.2, 131.2, 129.0, 128.3, 127.3, 127.0, 123.6, 114.7, 55.6.

**HRMS (ESI):** calcd for C<sub>21</sub>H<sub>18</sub>NO<sub>2</sub><sup>+</sup> ([M+H]<sup>+</sup>) 316.1332, found 316.1333.

**IR (neat):** 3003, 1645, 1592, 1574, 1502, 1246, 833 cm<sup>-1</sup>.

### General procedure for aziridination:

To a mixture of 7.5 mL CH<sub>2</sub>Cl<sub>2</sub> and 0.25 mL H<sub>2</sub>O cooled to 0 °C was added trifluoroethylamine hydrochloride (203 mg, 1.5 mmol) and NaNO<sub>2</sub> (124 mg, 1.8 mmol). After being stirred at this temperature for 1 h, the reaction mixture was cooled to -78 °C. Then, after 20-25 min the appropriate imine (0.5 mmol) and BF<sub>3</sub>·OEt<sub>2</sub> (111 µL, 0.9 mmol) were added consecutively. After the indicated time, the reaction was quenched with MeOH and sat. NaHCO<sub>3</sub>. The reaction mixture was extracted with CH<sub>2</sub>Cl<sub>2</sub> (3x), dried over MgSO<sub>4</sub> and the solvent was evaporated under reduced pressure. The residue was purified by flash column chromatography (hexane/ethyl acetate) to afford the pure *cis*-isomer

### ((2*SR*,3*RS*)-1-(4-methoxyphenyl)-3-(trifluoromethyl)aziridin-2-yl)(phenyl)methanone (4a)

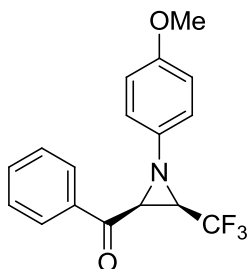

The title compound was obtained as an amorphous solid (103 mg, 64 %) following the general procedure (dr 17:1).

**<sup>1</sup>H-NMR (300 MHz, CDCl<sub>3</sub>):** δ = 8.14 – 8.05 (m, 2H), 7.66 – 7.57 (m, 1H), 7.54 – 7.41 (m, 2H), 7.07 – 6.97 (m, 2H), 6.89 – 6.76 (m, 2H), 3.77 (s, 3H), 3.60 (d, *J* = 6.6 Hz, 1H), 3.14 (dq, *J* = 6.7, 5.6 Hz, 1H).

**<sup>13</sup>C-NMR (100 MHz, CDCl<sub>3</sub>):** δ = 190.5, 156.6, 143.5, 135.2, 134.1, 128.8, 128.7, 123.3 (q, *J* = 274.7 Hz), 120.7, 114.7, 55.5, 45.7, 44.4 (q, *J* = 40.2 Hz).

**<sup>19</sup>F-NMR (282 MHz, CDCl<sub>3</sub>):** δ = -67.7 (d, *J* = 5.4 Hz).

**HRMS (EI):** calcd for C<sub>17</sub>H<sub>14</sub>F<sub>3</sub>NO<sub>2</sub><sup>+</sup> (*M*<sup>+</sup>) 321.0977, found 321.0972.

**IR (neat):** 2957, 2837, 2359, 1692, 1597, 1240, 1142 cm<sup>-1</sup>.



**(4-fluorophenyl)((2*SR*,3*RS*)-1-(4-methoxyphenyl)-3-(trifluoromethyl)aziridin-2-yl)methanone (4b)**

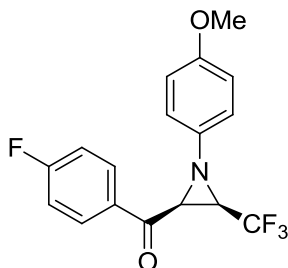

The title compound was obtained as an amorphous solid (132 mg, 78 %) following the general procedure for aziridination (dr 19:1).

**<sup>1</sup>H-NMR (300 MHz, CDCl<sub>3</sub>):**  $\delta$  = 8.20 – 8.12 (m, 2H), 7.22 – 7.10 (m, 2H), 7.06 – 6.98 (m, 2H), 6.90 – 6.78 (m, 2H), 3.79 (s, 3H), 3.54 (d,  $J$  = 6.5 Hz, 1H), 3.11 (dq,  $J$  = 6.6, 5.5 Hz, 1H).

**<sup>13</sup>C-NMR (100 MHz, CDCl<sub>3</sub>):**  $\delta$  = 189.1, 166.3 (d,  $J$  = 256.8 Hz), 156.7, 143.3, 131.7 (d,  $J$  = 2.9 Hz), 131.5 (d,  $J$  = 9.5 Hz), 123.2 (q,  $J$  = 274.6 Hz), 120.7, 116.1 (d,  $J$  = 22.0 Hz), 114.7, 55.6, 45.4, 44.3 (q,  $J$  = 40.2 Hz).

**<sup>19</sup>F-NMR (282 MHz, CDCl<sub>3</sub>):**  $\delta$  = -67.8 (d,  $J$  = 5.5 Hz) , -102.6 (m).

**HRMS (ESI):** calcd for C<sub>17</sub>H<sub>14</sub>F<sub>4</sub>NO<sub>2</sub> ([M+H]<sup>+</sup>) 340.0955, found 340.0957.

**IR (neat):** 3003, 1688, 1595, 1509, 1146 cm<sup>-1</sup>.

**(4-methoxyphenyl)((2*SR*,3*RS*)-1-(4-methoxyphenyl)-3-(trifluoromethyl)aziridin-2-yl)methanone (4c)**

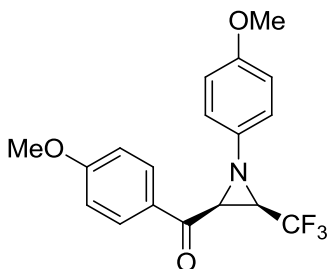

The title compound was obtained as an amorphous solid (87 mg, 50 %) following the general procedure for aziridination (dr 12:1).

**<sup>1</sup>H-NMR (300 MHz, CDCl<sub>3</sub>):**  $\delta$  = 8.13 – 8.06 (m, 2H), 7.05 – 6.91 (m, 4H), 6.87 – 6.78 (m, 2H), 3.87 (s, 3H), 3.77 (s, 3H), 3.54 (d,  $J$  = 6.7 Hz, 2H), 3.09 (dq,  $J$  = 6.3, 5.5 Hz, 1H).

**<sup>13</sup>C-NMR (100 MHz, CDCl<sub>3</sub>):**  $\delta$  = 188.9, 164.3, 156.6, 143.7, 131.1, 128.4, 123.3 (q,  $J$  = 274.8 Hz), 120.7, 114.7, 114.0, 55.57, 55.55, 45.5, 44.3 (q,  $J$  = 40.1 Hz).

**<sup>19</sup>F-NMR (282 MHz, CDCl<sub>3</sub>):**  $\delta$  = -67.8 (d,  $J$  = 5.3 Hz).

**HRMS (ESI):** calcd for C<sub>18</sub>H<sub>17</sub>F<sub>3</sub>NO<sub>3</sub><sup>+</sup> ([M+H]<sup>+</sup>) 352.1155, found 352.1148.

**IR (neat):** 1961, 2841, 1681, 1597, 1509, 1241, 1141 cm<sup>-1</sup>.

**(2*SR*,3*RS*)-ethyl 1-(4-methoxyphenyl)-3-(trifluoromethyl)aziridin-2-carboxylate (4d)**

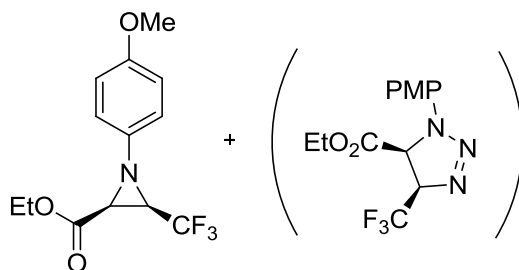

The title compound was obtained as an oil (104 mg total, 83 % purity (17 % cycloaddition product, designed as minor below), 87 mg, 60%) following the general procedure for aziridination (dr 11:1).

**<sup>1</sup>H-NMR (300 MHz, CDCl<sub>3</sub>):**  $\delta$  = 6.99 – 6.85 (m, 2H), 6.83 – 6.76 (m, 2H), 5.23 (dq,  $J$  = 8.5, 7.4 Hz, 1H, minor), 4.56 (d,  $J$  = 8.4 Hz, 1H, minor), 4.40 – 4.17 (m, 2H), 3.79 (s, 3H, minor), 3.75 (s, 3H), 3.05 (d,  $J$  = 6.6 Hz, 1H), 2.88 (dq,  $J$  = 6.6, 5.5 Hz, 1H), 1.31 (t,  $J$  = 7.1 Hz, 3H).

**<sup>13</sup>C-NMR (100 MHz, CDCl<sub>3</sub>):**  $\delta$  = 167.8 (minor), 165.8, 157.0 (minor), 156.6, 143.2, 132.5 (minor), 123.1 (q,  $J$  = 274.4 Hz), 120.5, 117.8 (minor), 114.8 (minor), 114.6, 82.1 (q,  $J$  = 29.9 Hz, minor), 63.0 (minor), 62.1, 57.9 (minor), 55.5, 43.1 (q,  $J$  = 40.8 Hz), 41.4, 13.9.

**<sup>19</sup>F-NMR (282 MHz, CDCl<sub>3</sub>):**  $\delta$  = -68.0 (d,  $J$  = 5.6 Hz, major), -73.2 (d,  $J$  = 7.7 Hz, minor).

**HRMS (ESI):** calcd for C<sub>13</sub>H<sub>15</sub>F<sub>3</sub>NO<sub>3</sub><sup>+</sup> ([M+H]<sup>+</sup>) 290.0999, found 290.1009.

**IR (neat):** 2986, 2838, 1751, 1508, 1240, 1143 cm<sup>-1</sup>.

Spectral data in accordance with literature values.<sup>6</sup>

**(3-chlorophenyl)((2*SR*,3*RS*)-1-(4-methoxyphenyl)-3-(trifluoromethyl)aziridin-2-yl)methanone (4e)**

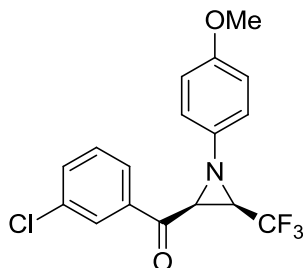

The title compound was obtained as yellow oil (79 mg, 61 %) following the general procedure for aziridination on a 0.365 mmol scale (dr 16:1).

**<sup>1</sup>H-NMR (300 MHz, CDCl<sub>3</sub>):**  $\delta$  = 8.07 (t,  $J$  = 1.7 Hz, 1H), 7.99 (ddd,  $J$  = 7.8, 1.6, 1.1 Hz, 1H), 7.59 (ddd,  $J$  = 8.0, 2.1, 1.1 Hz, 1H), 7.52 – 7.39 (m, 1H), 7.05 – 6.96 (m, 2H), 6.89 – 6.78 (m, 2H), 3.77 (s, 3H), 3.56 (d,  $J$  = 6.6 Hz, 1H), 3.14 (dq,  $J$  = 6.7, 5.5 Hz, 1H).

**<sup>13</sup>C-NMR (100 MHz, CDCl<sub>3</sub>):**  $\delta$  = 189.6, 156.7, 143.2, 136.7, 135.2, 134.1, 130.2, 128.7, 126.8, 123.1 (q,  $J$  = 274.7 Hz), 120.7, 114.7, 55.5, 45.5, 44.4 (q,  $J$  = 40.2 Hz).

**<sup>19</sup>F-NMR (282 MHz, CDCl<sub>3</sub>):**  $\delta$  = -67.7 (d,  $J$  = 5.9 Hz).

**HRMS (ESI):** calcd for C<sub>17</sub>H<sub>14</sub>ClF<sub>3</sub>NO<sub>2</sub><sup>+</sup> ([M+H]<sup>+</sup>) 356.0660, found 356.0647.

**IR (neat):** 2959, 2837, 1698, 1572, 1508, 1240, 1144 cm<sup>-1</sup>.

**((2*SR*,3*RS*)-1-(4-methoxyphenyl)-3-(trifluoromethyl)aziridin-2-yl)(*p*-tolyl)methanone (4f)**

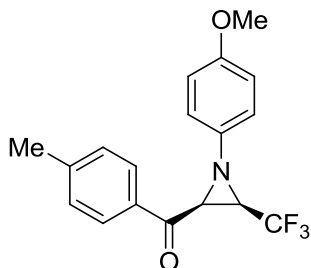

The title compound was obtained as an amorphous solid (100 mg, 60 %) following the general procedure for aziridination (dr 16:1).

**<sup>1</sup>H-NMR (300 MHz, CDCl<sub>3</sub>):** δ = 8.05 – 7.96 (m, 2H), 7.35 – 7.21 (m, 2H), 7.08 – 6.94 (m, 2H), 6.91 – 6.77 (m, 2H), 3.77 (s, 3H, major), 3.57 (d, *J* = 6.6 Hz, 1H), 3.12 (dq, *J* = 6.7, 5.6 Hz, 1H), 2.42 (s, 3H).

**<sup>13</sup>C-NMR (100 MHz, CDCl<sub>3</sub>):** δ = 190.0, 156.6, 145.2, 143.7, 132.8, 129.5, 128.8, 123.29 (q, *J* = 274.7 Hz), 120.7, 114.6, 55.5, 45.7, 44.4 (q, *J* = 40.1 Hz), 21.8.

**<sup>19</sup>F-NMR (282 MHz, CDCl<sub>3</sub>):** δ = -67.8 (d, *J* = 5.7 Hz).

**HRMS (ESI):** calcd for C<sub>18</sub>H<sub>17</sub>F<sub>3</sub>NO<sub>2</sub><sup>+</sup> ([M+H]<sup>+</sup>) 336.1206, found 336.1207.

**IR (neat):** 2963, 2838, 2360, 1685, 1605, 1508, 1240, 1143 cm<sup>-1</sup>.

**(4-bromophenyl)((2*SR*,3*RS*)-1-(4-methoxyphenyl)-3-(trifluoromethyl)aziridin-2-yl)methanone (4g)**

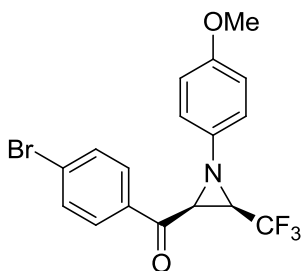

The title compound was obtained as an amorphous solid (94 mg, 47 %) following the general procedure for aziridination (dr 13:1).

**<sup>1</sup>H-NMR (300 MHz, CDCl<sub>3</sub>):** δ = 8.01 – 7.93 (m, 2H), 7.69 – 7.56 (m, 2H), 7.06 – 6.95 (m, 2H), 6.90 – 6.78 (m, 2H), 3.78 (s, 3H), 3.53 (d, *J* = 6.6 Hz, 1H), 3.11 (dq, *J* = 6.7, 5.5 Hz, 1H).

**<sup>13</sup>C-NMR (100 MHz, CDCl<sub>3</sub>):** δ = 189.9, 156.7, 143.2, 134.0, 132.2, 130.2, 129.5, 123.2 (q, *J* = 274.7 Hz), 120.7, 114.7, 55.6, 45.4, 44.4 (q, *J* = 40.1 Hz).

**<sup>19</sup>F-NMR (282 MHz, CDCl<sub>3</sub>):** δ = -67.56 (d, *J* = 5.3 Hz).

**HRMS (ESI):** calcd for C<sub>17</sub>H<sub>14</sub>BrF<sub>3</sub>NO<sub>2</sub><sup>+</sup> ([M+H]<sup>+</sup>) 400.0155, found 400.0162.

**IR (neat):** 1691, 1582, 1508, 1144 cm<sup>-1</sup>.

**((2*SR*,3*RS*)-1-(4-methoxyphenyl)-3-(trifluoromethyl)aziridin-2-yl)(naphthalen-1-yl)methanone (4h)**

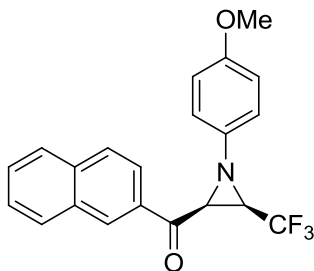

The title compound was obtained as an amorphous solid (130 mg, 70 %) following the general procedure for aziridination (dr 15:1).

**<sup>1</sup>H-NMR (300 MHz, CDCl<sub>3</sub>):**  $\delta$  = 8.76 – 8.61 (m, 1H), 8.13 (dd,  $J$  = 8.6, 1.7 Hz, 1H), 8.03 – 7.84 (m, 3H), 7.60 (dddd,  $J$  = 21.2, 8.1, 6.9, 1.3 Hz, 2H), 7.12 – 7.00 (m, 2H), 6.93 – 6.78 (m, 2H), 3.80 (s, 3H), 3.72 (d,  $J$  = 6.6 Hz, 1H), 3.22 (dq,  $J$  = 6.6, 5.5 Hz, 1H).

**<sup>13</sup>C-NMR (100 MHz, CDCl<sub>3</sub>):**  $\delta$  = 190.4, 156.7, 143.6, 136.1, 132.6, 132.4, 131.0, 129.8, 129.1, 128.8, 127.9, 123.3 (q,  $J$  = 274.7 Hz), 127.0, 123.8, 120.7, 114.7, 55.6, 45.8, 44.5 (q,  $J$  = 40.1 Hz).

**<sup>19</sup>F-NMR (282 MHz, CDCl<sub>3</sub>):**  $\delta$  = -67.65 (d,  $J$  = 5.5 Hz).

**HRMS (ESI):** calcd for C<sub>21</sub>H<sub>17</sub>F<sub>3</sub>NO<sub>2</sub><sup>+</sup> ([M+H]<sup>+</sup>) 372.1206, found 372.1197.

**IR (neat):** 1694, 1624, 1508, 1142 cm<sup>-1</sup>.

**[1,1'-biphenyl]-4-yl((2*SR*,3*RS*)-1-(4-methoxyphenyl)-3-(trifluoromethyl)aziridin-2-yl)methanone (4i)**

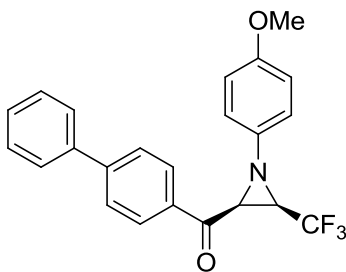

The title compound was obtained as an amorphous solid (144 mg, 73 %) following the general procedure for aziridination (dr 15:1).

**<sup>1</sup>H-NMR (300 MHz, CDCl<sub>3</sub>):**  $\delta$  = 8.28 – 8.12 (m, 2H), 7.76 – 7.67 (m, 2H), 7.67 – 7.59 (m, 2H), 7.53 – 7.31 (m, 3H), 7.11 – 6.97 (m, 2H), 6.92 – 6.78 (m, 2H), 3.79 (s, 3H), 3.62 (d,  $J$  = 6.6 Hz, 1H), 3.22 – 3.05 (m, 1H).

**<sup>13</sup>C-NMR (100 MHz, CDCl<sub>3</sub>):**  $\delta$  = 190.1, 156.7, 146.8, 143.6, 139.6, 133.9, 129.3, 129.0, 128.5, 127.4, 127.3, 127.2 – 118.8 (m), 120.7, 114.7, 55.6, 45.7, 44.4 (q,  $J$  = 40.0 Hz).

**<sup>19</sup>F-NMR (282 MHz, CDCl<sub>3</sub>):**  $\delta$  = -67.51 (d,  $J$  = 5.6 Hz).

**HRMS (ESI):** calcd for C<sub>23</sub>H<sub>19</sub>F<sub>3</sub>NO<sub>2</sub><sup>+</sup> ( $[M+H]^+$ ) 398.1362, found 398.1362.

**IR (neat):** 1682, 1603, 1506, 1143 cm<sup>-1</sup>.

### phenyl((2*SR*,3*RS*)-3-(trifluoromethyl)aziridin-2-yl)methanone (5)

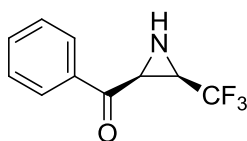

To a solution of ((2*SR*,3*RS*)-1-(4-methoxyphenyl)-3-(trifluoromethyl)aziridin-2-yl)(phenyl)methanone (100 mg, 0.31 mmol) in 8 ml CH<sub>3</sub>CN was added (NH<sub>4</sub>)<sub>2</sub>Ce(NO<sub>3</sub>)<sub>6</sub> (427 mg, 0.78 mmol) in 2.7 ml H<sub>2</sub>O at 0 °C. After 1 h 30 min the reaction was quenched with sat. Na<sub>2</sub>SO<sub>3</sub> and sat. NaHCO<sub>3</sub>, extracted 3 times with dichloromethane, dried over MgSO<sub>4</sub> and the solvent evaporated under reduced pressure.

The residue was purified on silica gel (hexane/ethyl acetate 70:30) to give the product as white solid (50 mg, 75 %).

**<sup>1</sup>H-NMR (300 MHz, CD<sub>3</sub>CN):**  $\delta$  = 8.13 – 8.03 (m, 2H), 7.70 – 7.62 (m, 1H), 7.59 – 7.48 (m, 2H), 3.62 (dd,  $J$  = 9.8, 6.6 Hz, 1H), 3.35 – 3.11 (m, 1H), 2.24 (br, 1H).

**<sup>13</sup>C-NMR (100 MHz, CD<sub>3</sub>CN):**  $\delta$  = 191.7, 135.9, 133.7, 128.7, 128.5, 124.6 (q,  $J$  = 273.2 Hz), 37.6, 35.0 (q,  $J$  = 39.3 Hz).

**<sup>19</sup>F-NMR (282 MHz, CD<sub>3</sub>CN):**  $\delta$  = -66.94 (d,  $J$  = 6.2 Hz).

**HRMS (ESI):** calcd for C<sub>10</sub>H<sub>9</sub>F<sub>3</sub>NO<sup>+</sup> ( $[M+H]^+$ ) 216.0631, found 216.0633.

**IR (neat):** 3196, 1684, 1596, 1132 cm<sup>-1</sup>.

References:

- <sup>1</sup> Floyd, M. B.; Du, M. T.; Fabio, P. F.; Jacob, L. A.; Johnson, B. D. *J. Org. Chem.* **1985**, *50*, 5022.
- <sup>2</sup> Reid, C. M.; Ebikeme, C.; Barrett, M. P.; Patzewitz, E.-M.; Müller, S.; Robins, D. J.; Sutherland, A. *Bioorg. Med. Chem. Lett.* **2008**, *18*, 2455.
- <sup>3</sup> Bhella, S. S.; Elango, M.; Ishar, M. P. S. *Tetrahedron* **2009**, *65*, 240.
- <sup>4</sup> Joshi, K. C.; PAthak, V. N.; Goyal, M. K. *J. Heterocycl. Chem.* **1981**, *18*, 1651.
- <sup>5</sup> Nakamura, A.; Ataka, T.; Segawa, H.; Takeuchi, T.; Takematsu, T. *Agric. Biol. Chem.* **1983**, *47*, 1555.
- <sup>6</sup> Spannedra, M. V.; Crousse, B.; Narizuka, S.; Bonnet-Delpon, D.; Bégué, J.-P. *Collect. Czech. Chem. Commun.* **2002**, *67*, 1359.

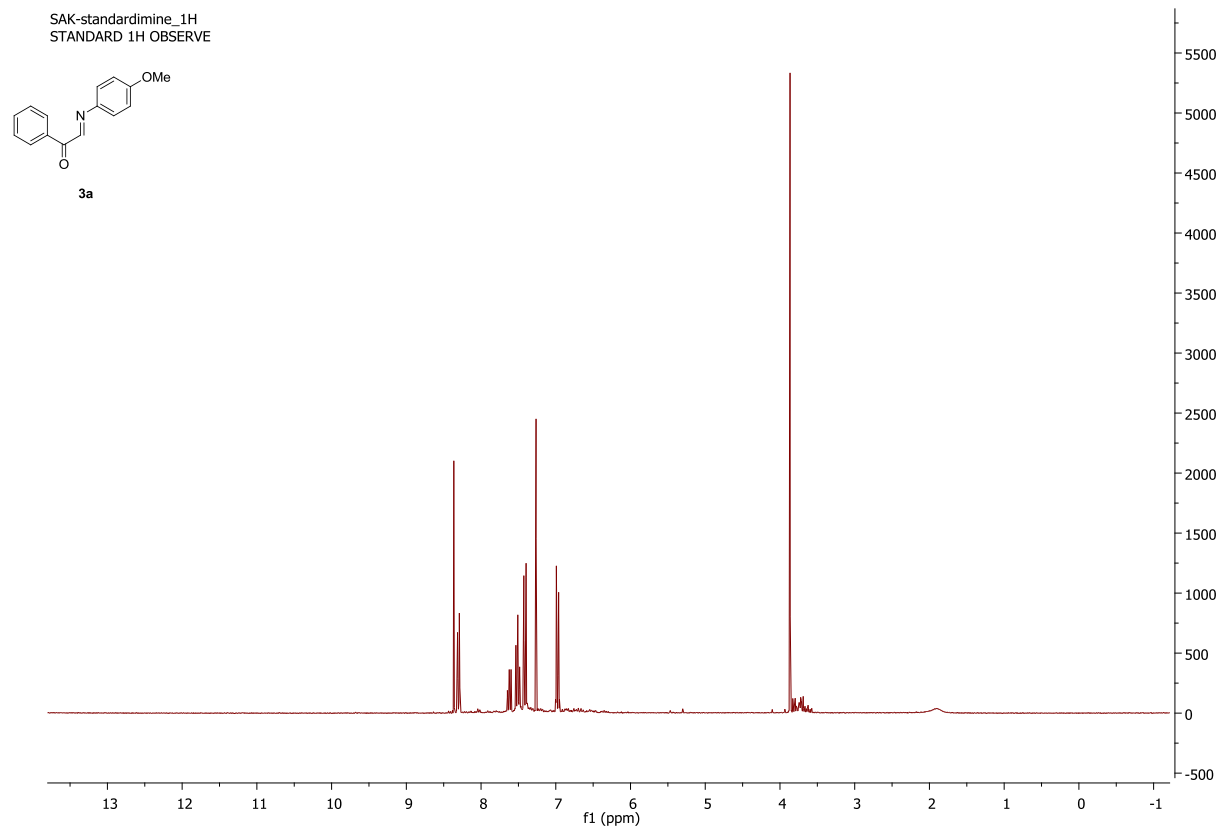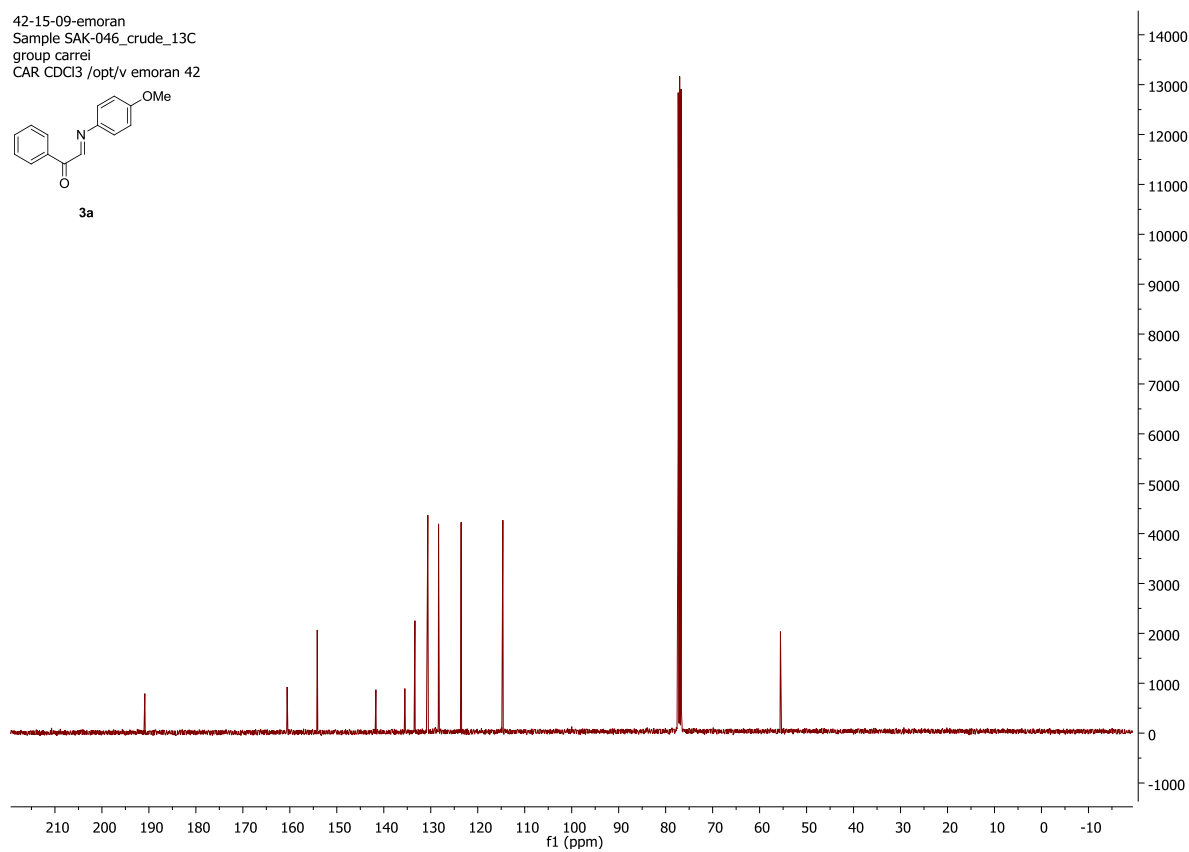



SAK-055\_crude\_1H  
STANDARD 1H OBSERVE

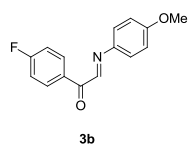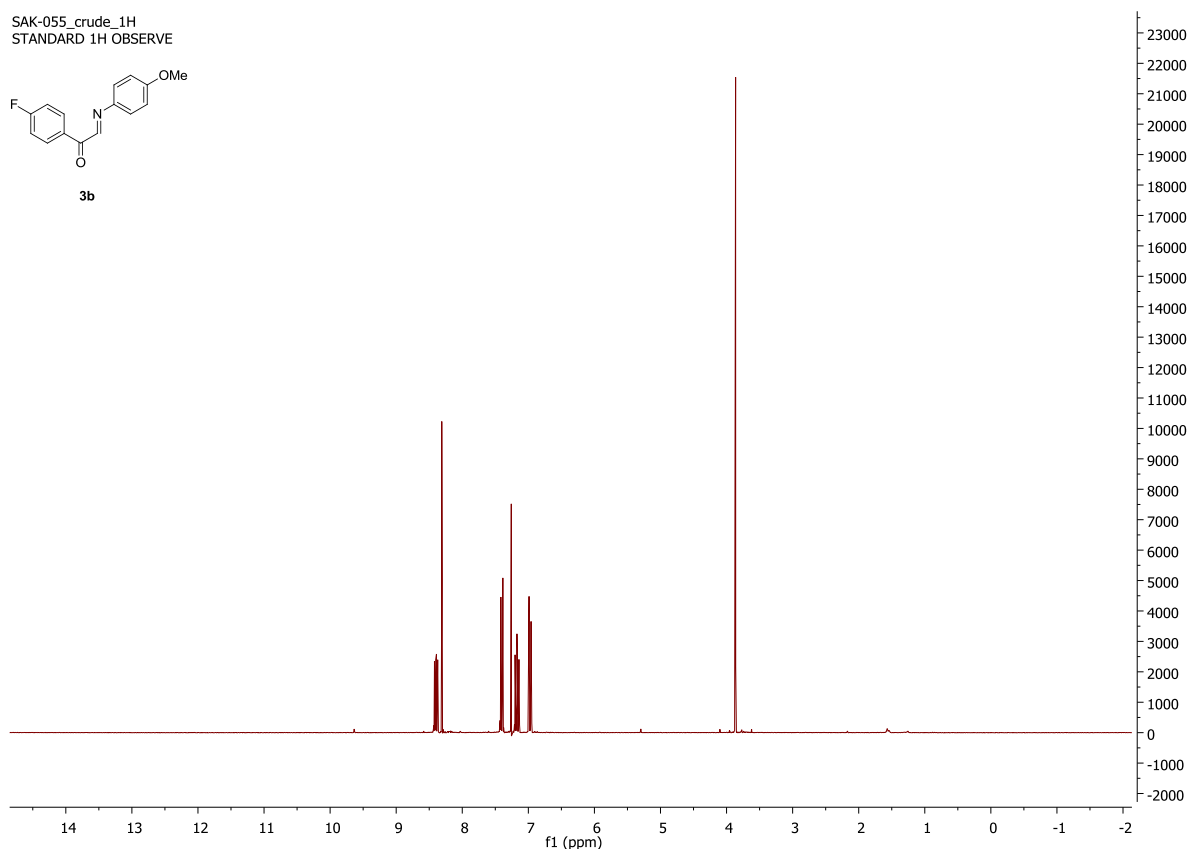

33-19-04-emoran  
Sample SAK-055\_crude\_13C  
group carrei  
CAR CDCl3 /opt/v emoran 33

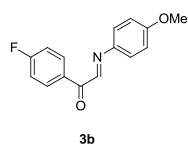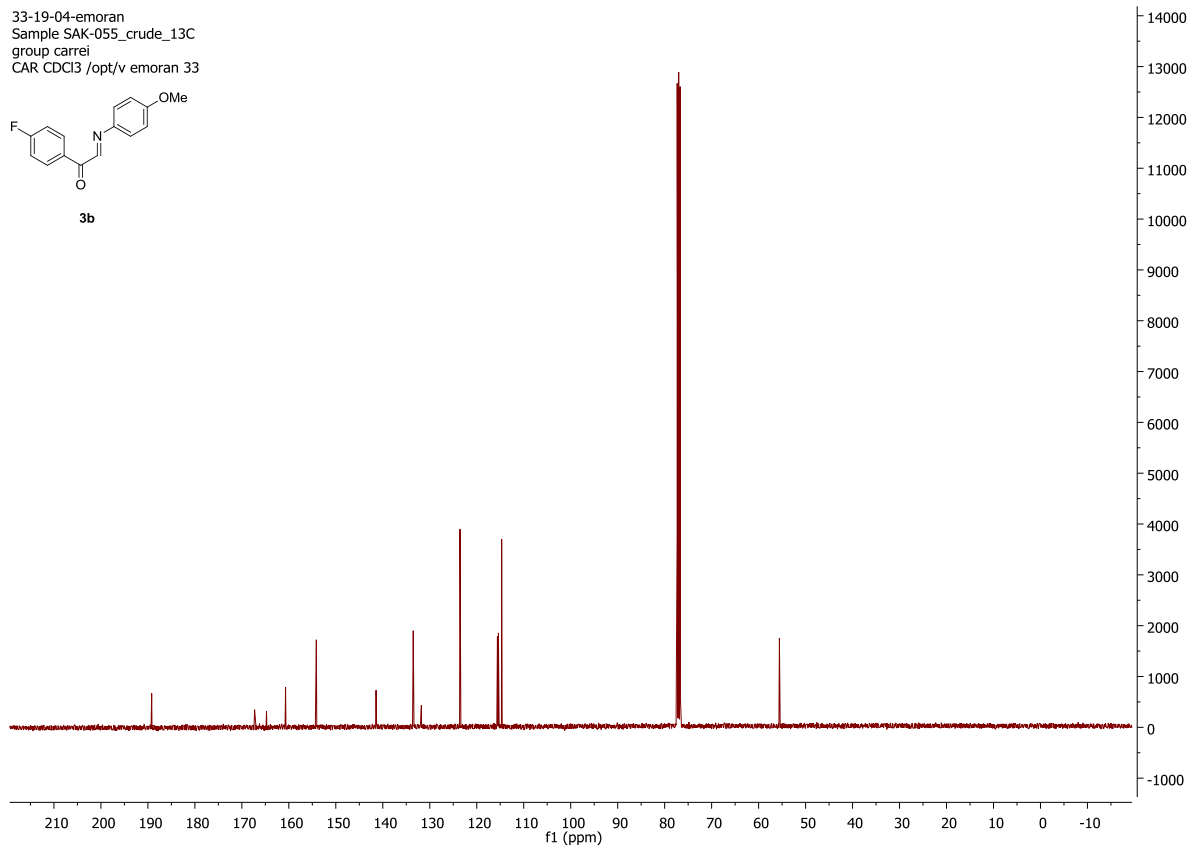

SAK-055\_crude\_19F  
19F OBSERVE  
STANDARD PARAMETERS

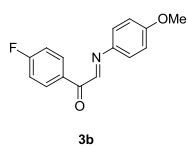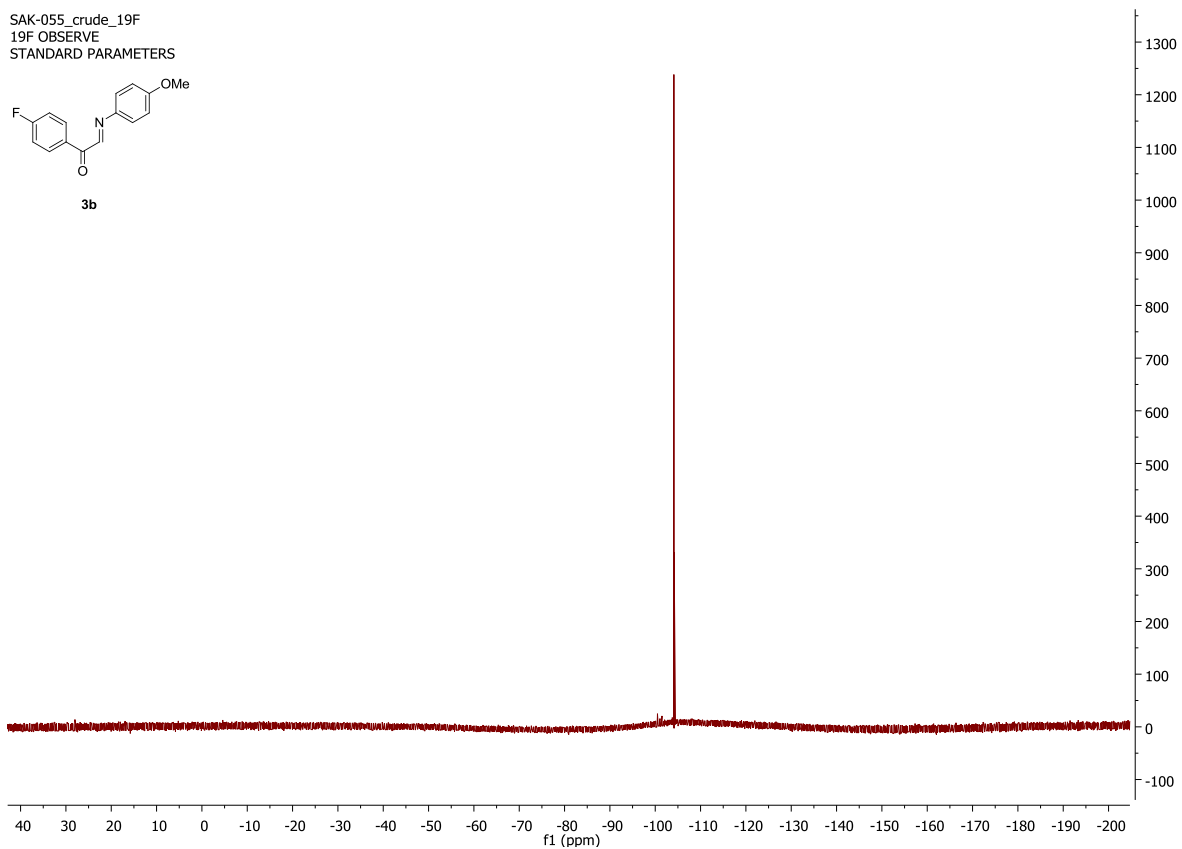

SAK-051\_crude\_1H  
STANDARD 1H OBSERVE

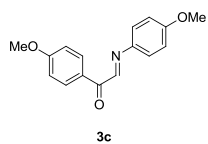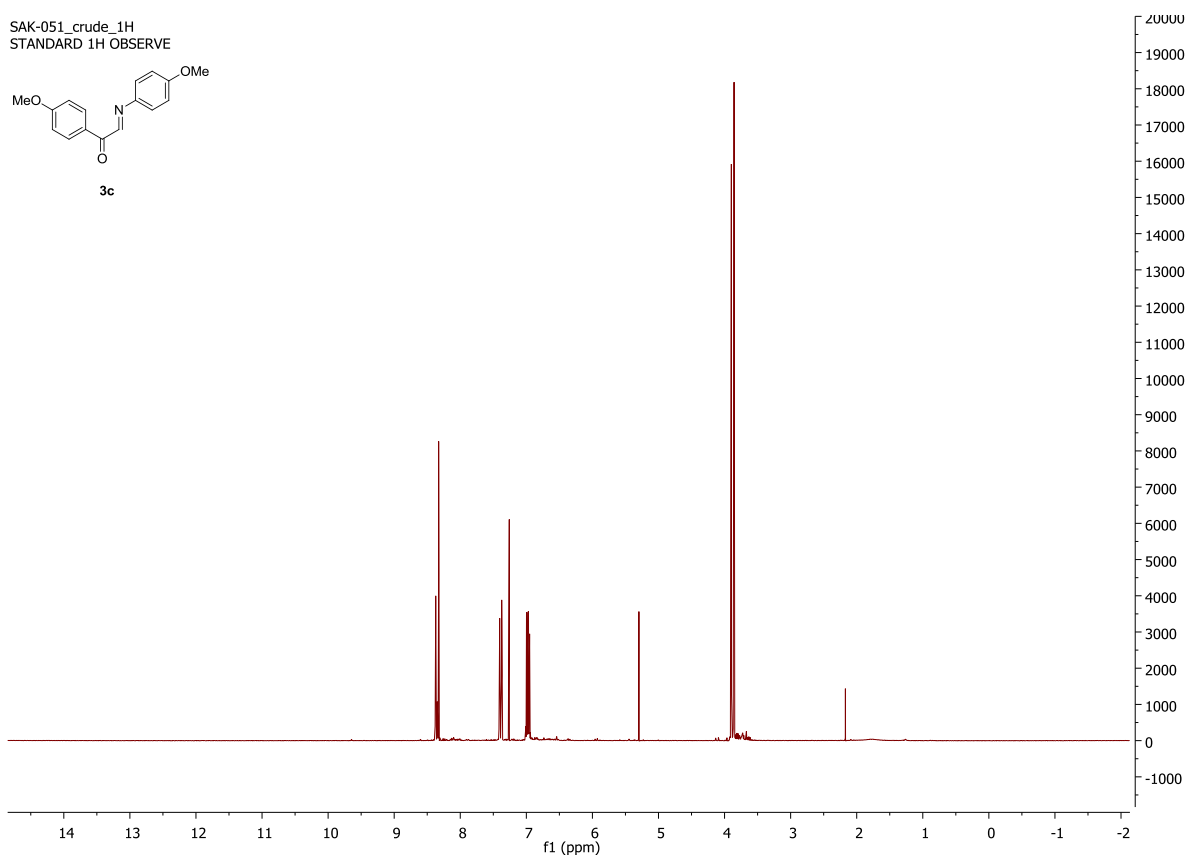

36-17-09-emoran  
 Sample SAK-051\_crude\_13C  
 group carrei  
 CAR CDCl3 /opt/v emoran 36

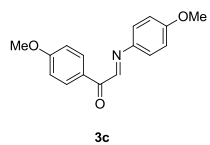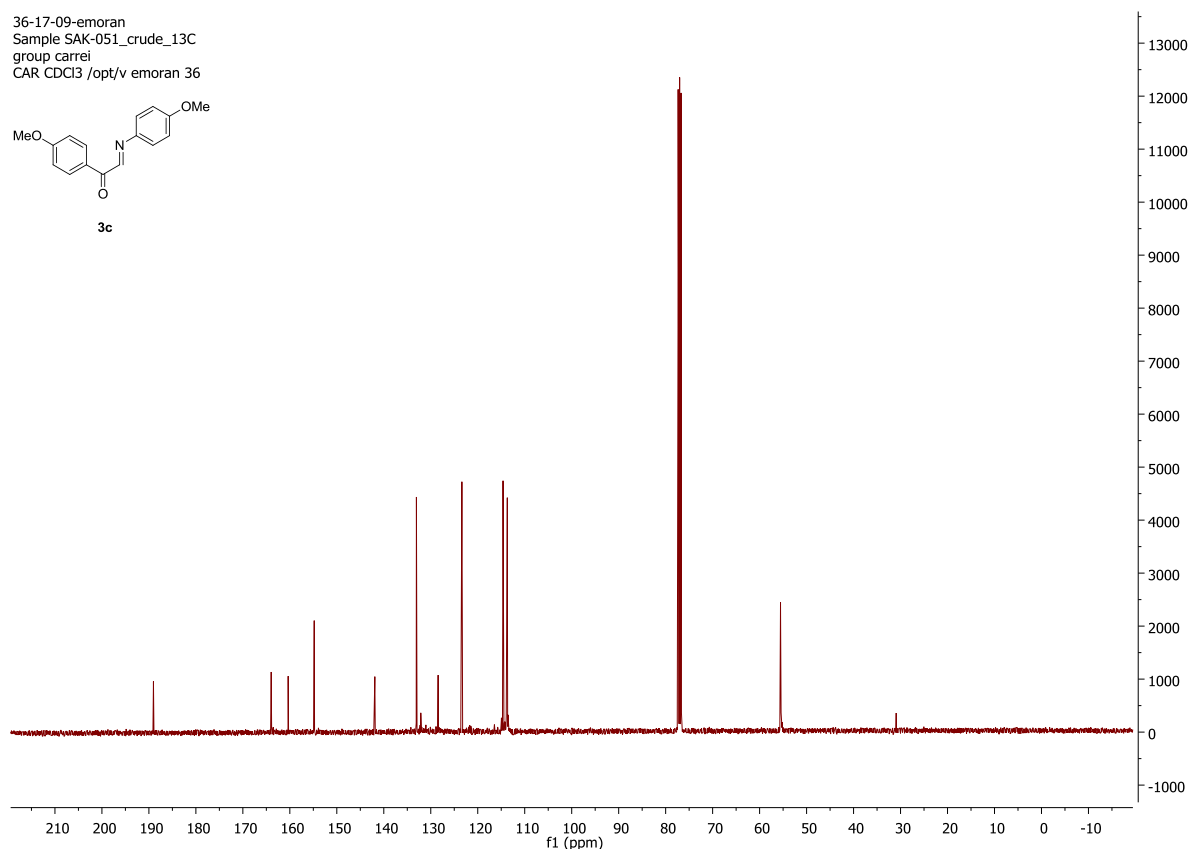

SAK-079\_crude\_1H  
 STANDARD 1H OBSERVE

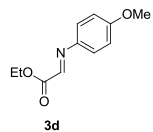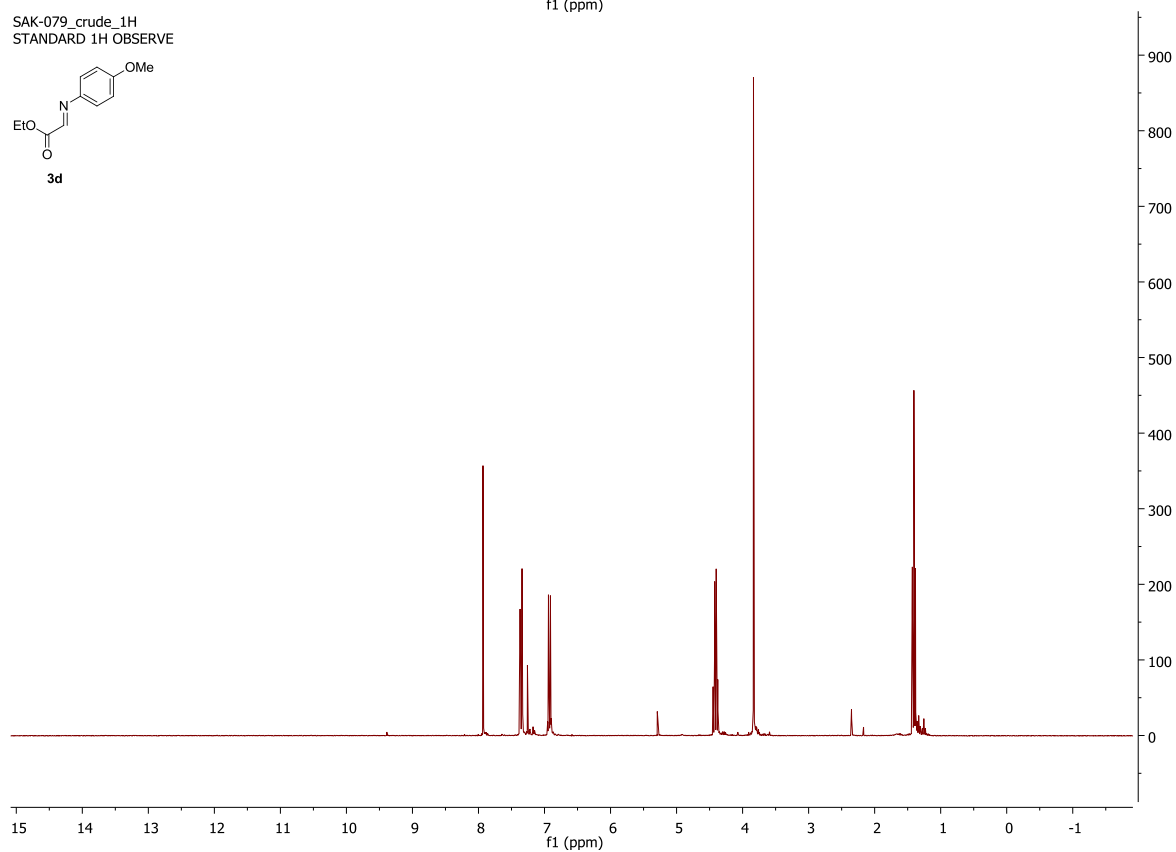

44-15-09-emoran  
 Sample SAK-079\_crude\_13C  
 group carrei  
 CAR CDCl3 /opt/v emoran 44

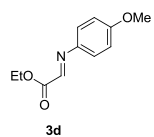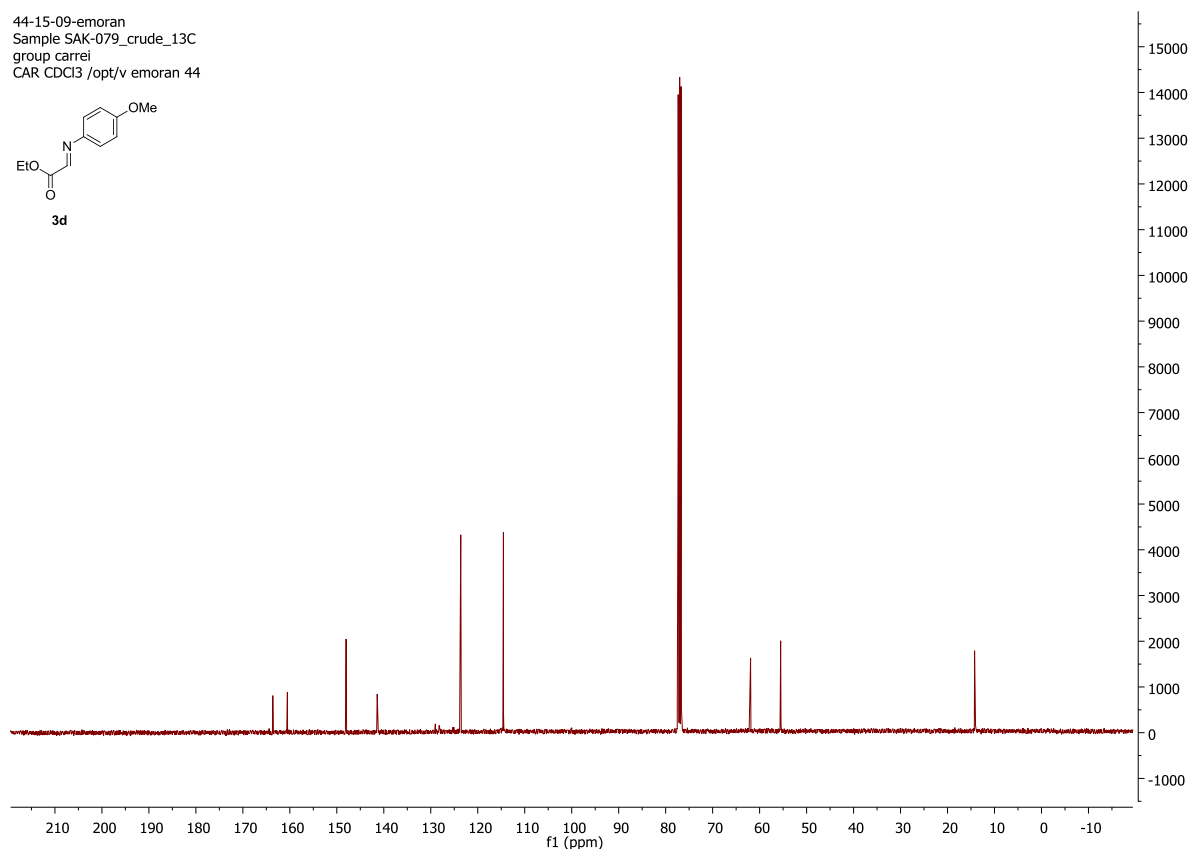

SAK-058\_crude\_1H  
 STANDARD 1H OBSERVE

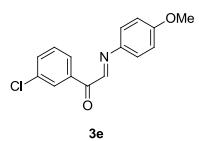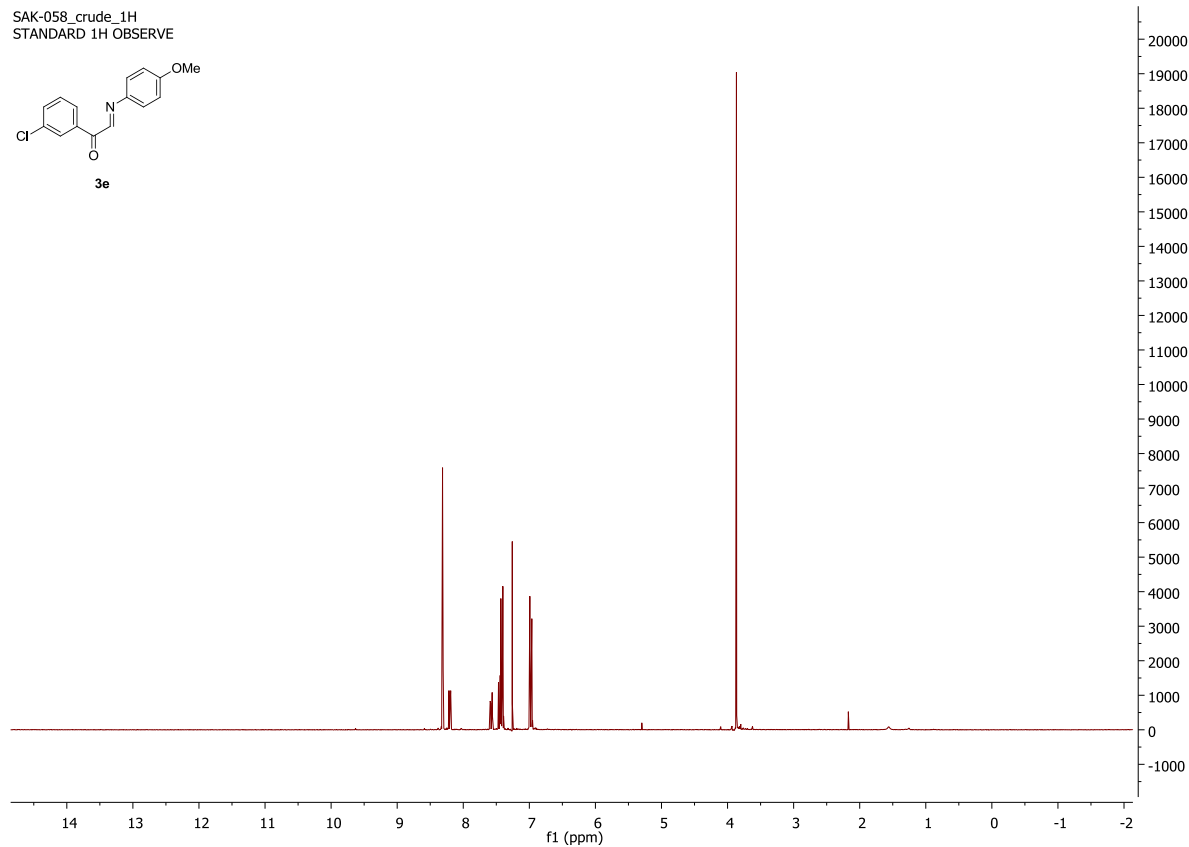

31-26-04-emoran  
 Sample SAK-058\_crude\_13C  
 group carrei  
 CAR CDCl3 /opt/v emoran 31

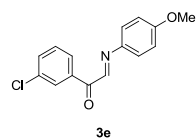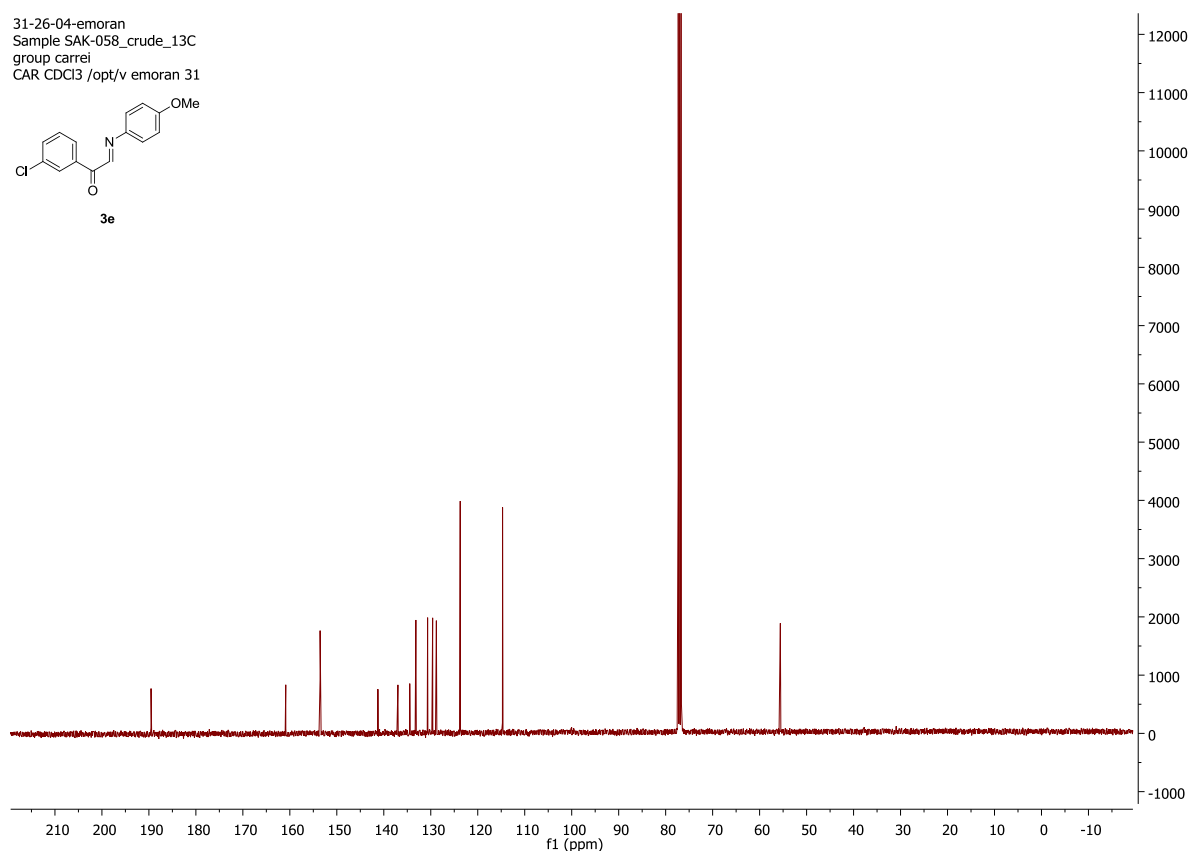

SAK-059\_crude\_1H  
 STANDARD 1H OBSERVE

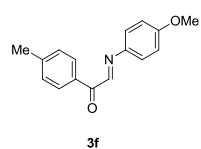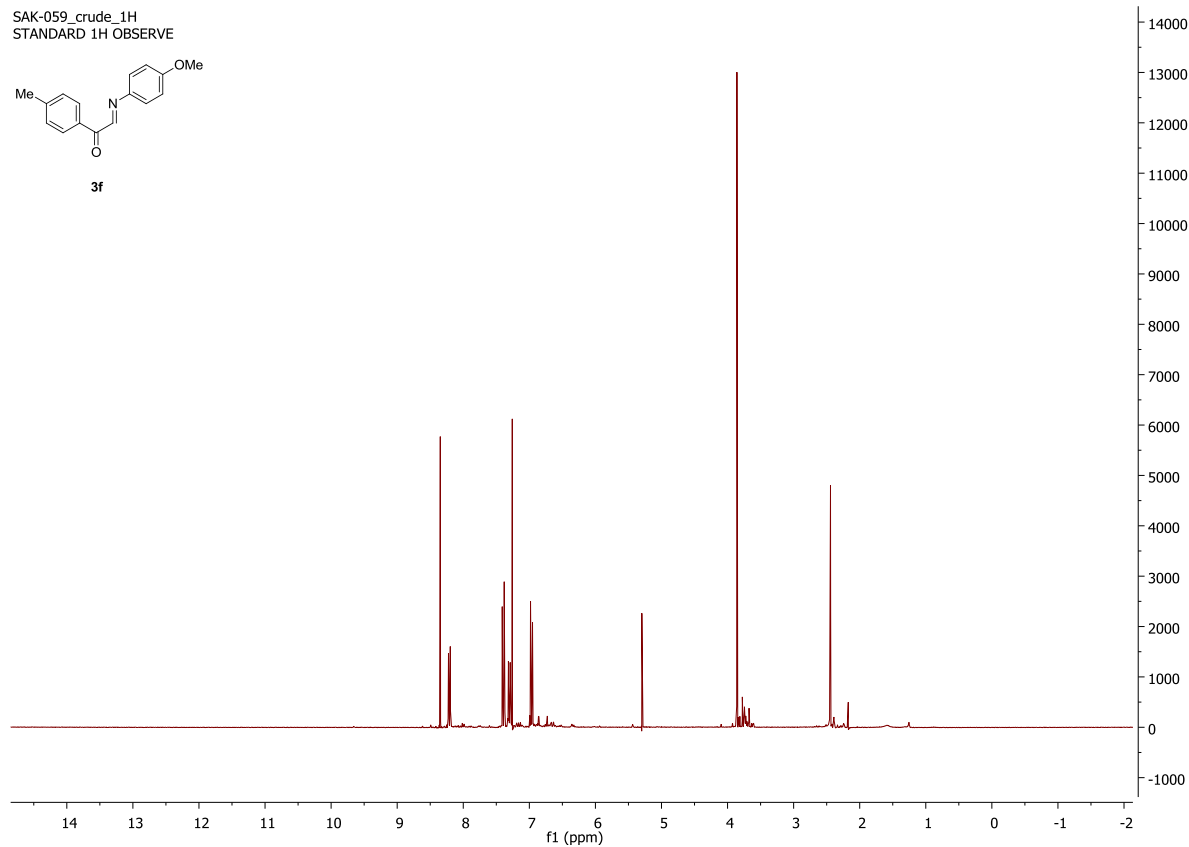

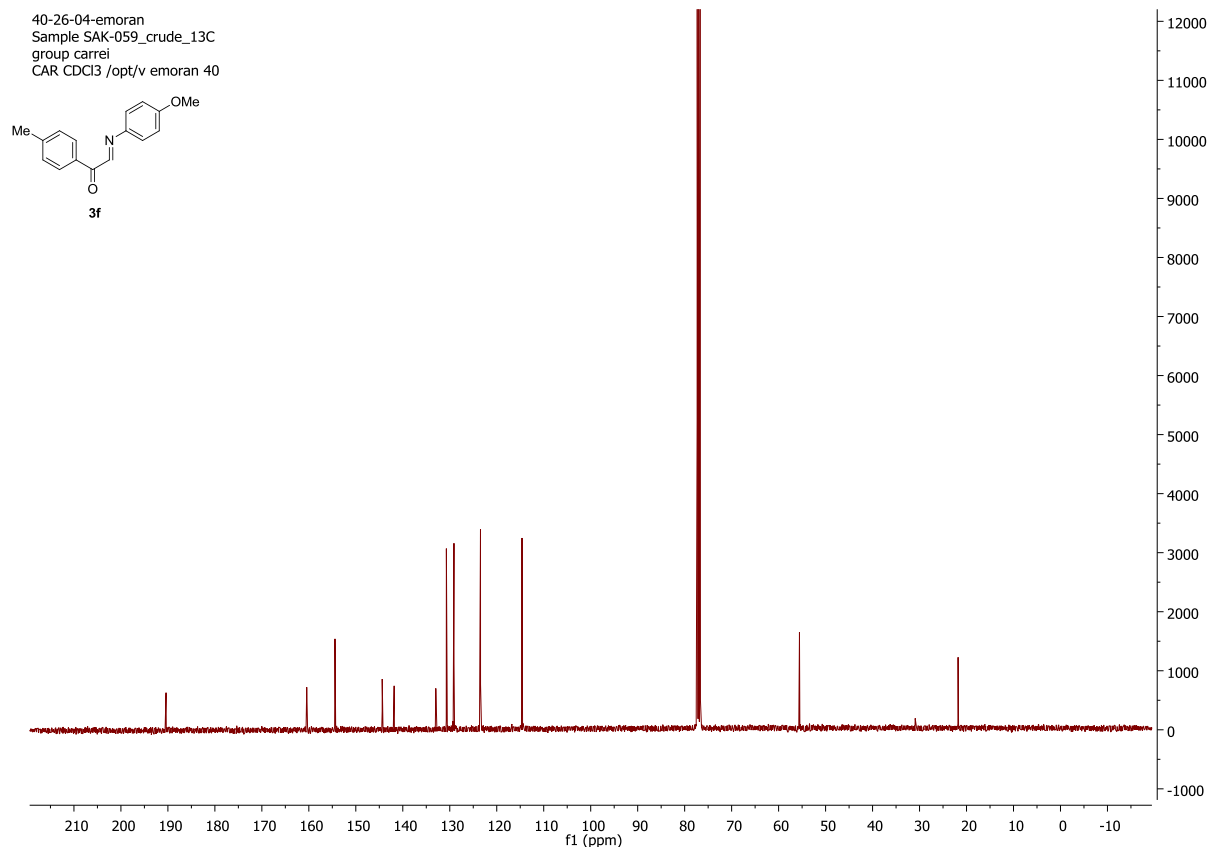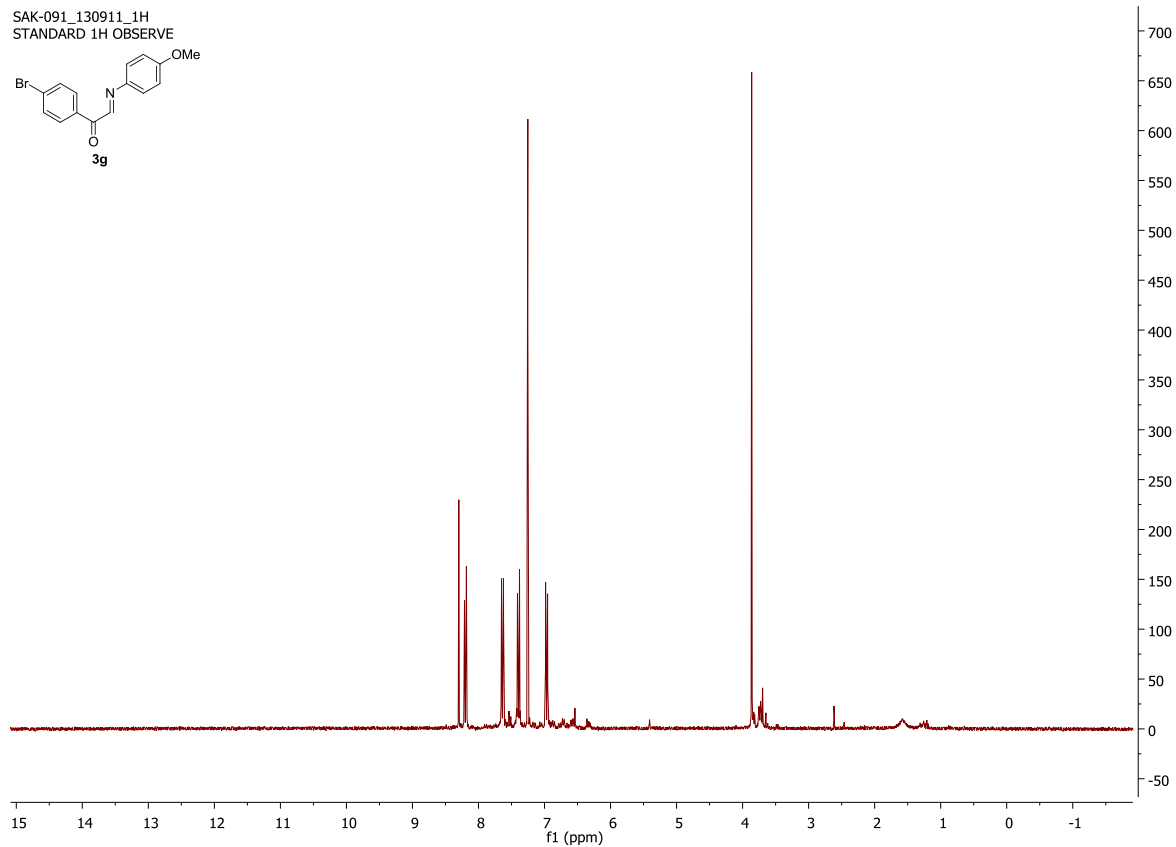

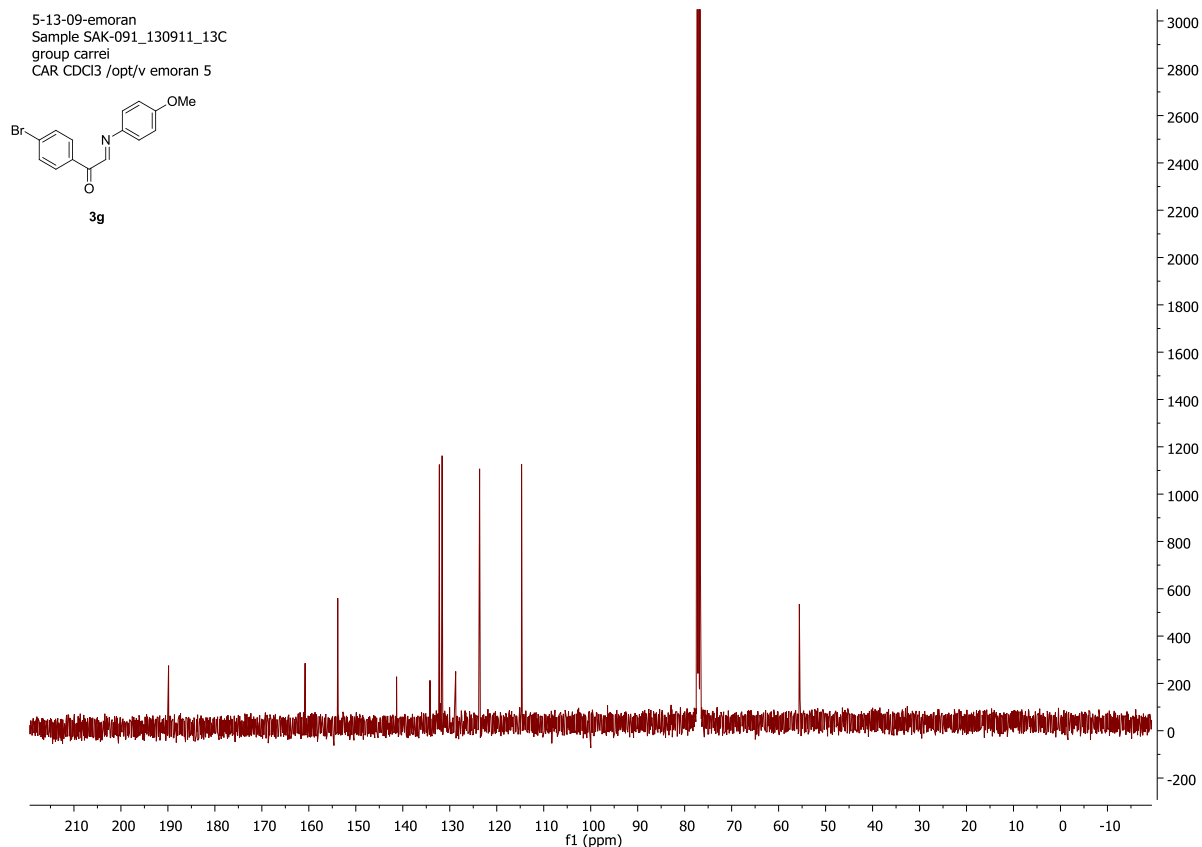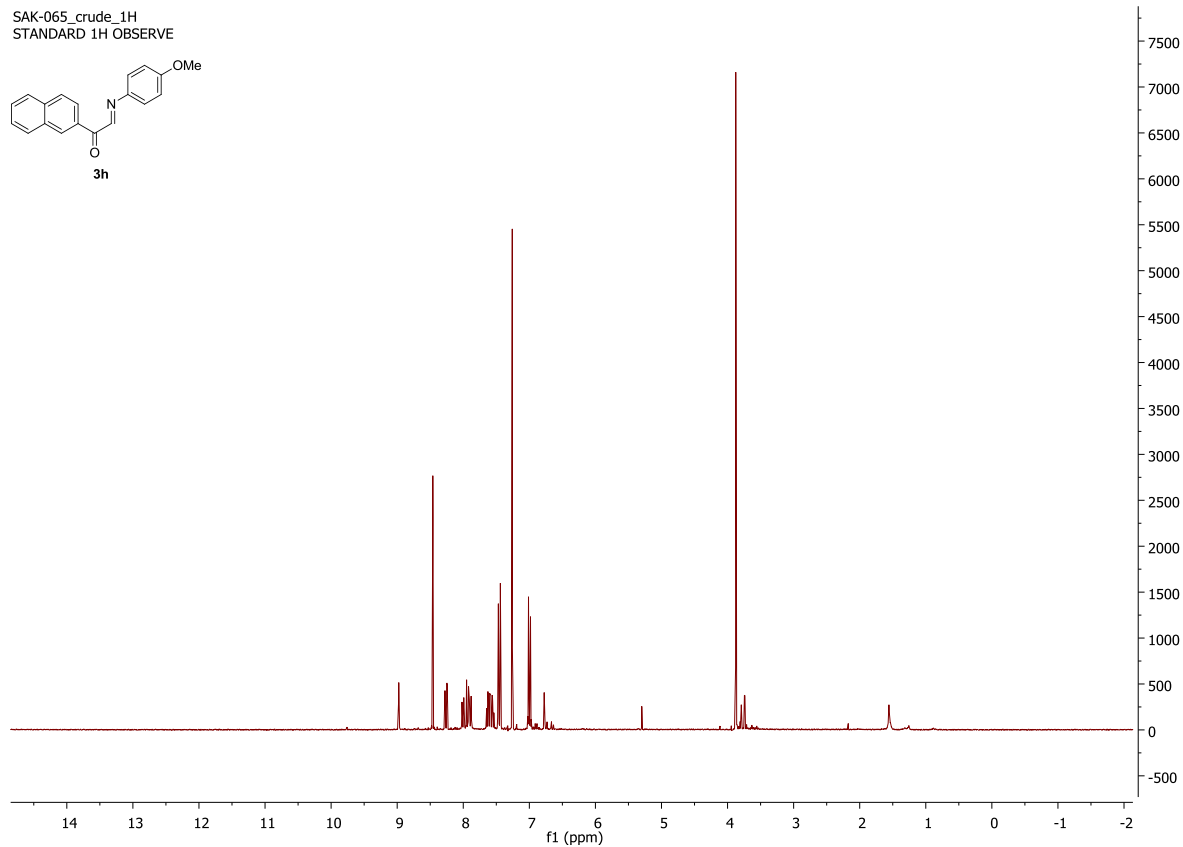

33-04-05-emoran  
Sample SAK-065\_crude\_13C  
group carrei  
CAR CDCl3 /opt/v emoran 33

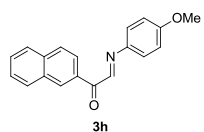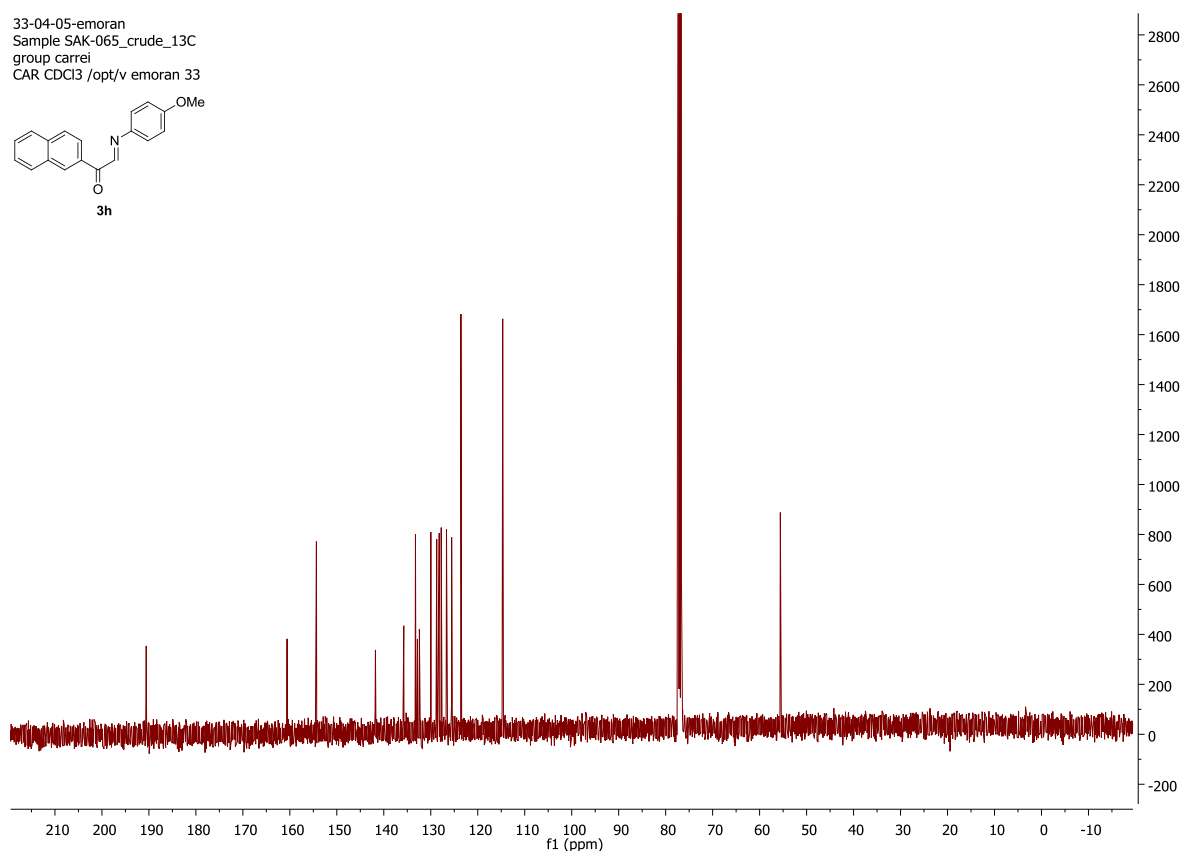

SAK-093\_filtered\_1H  
STANDARD 1H OBSERVE

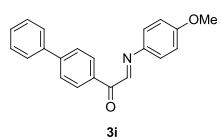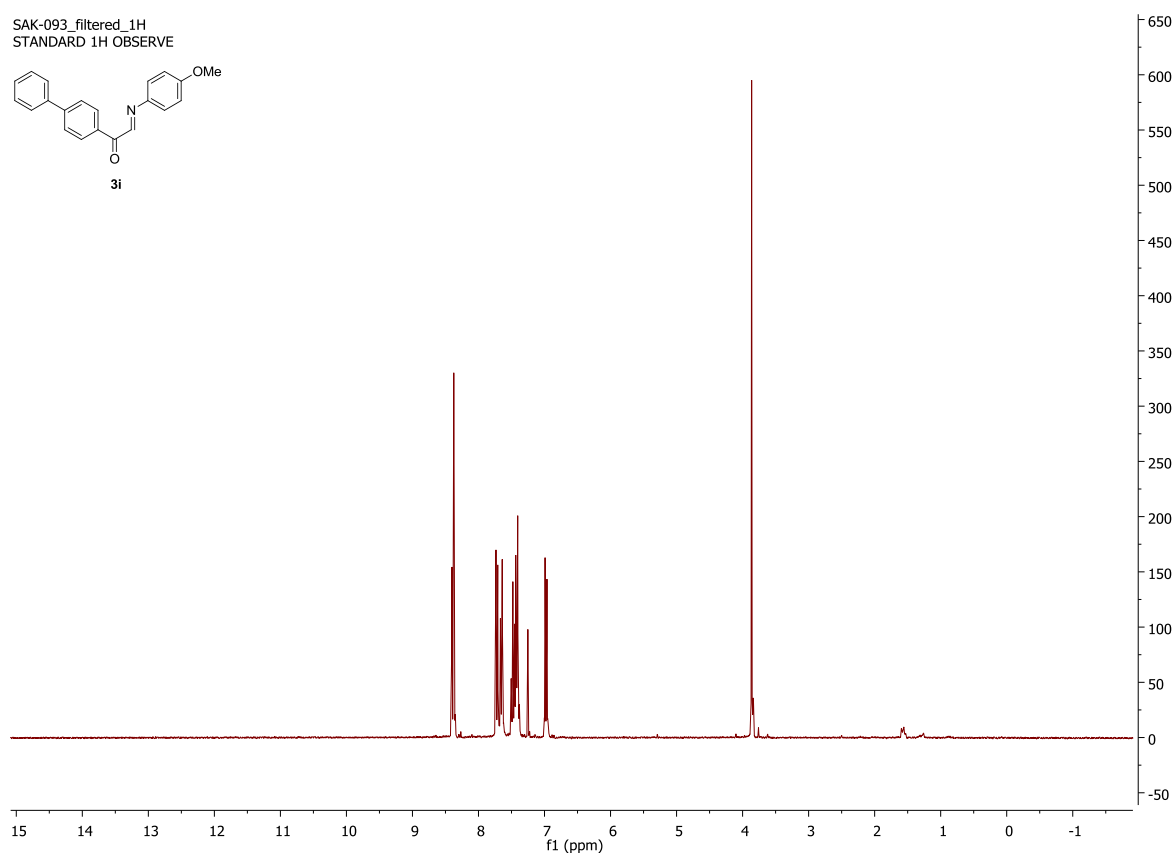



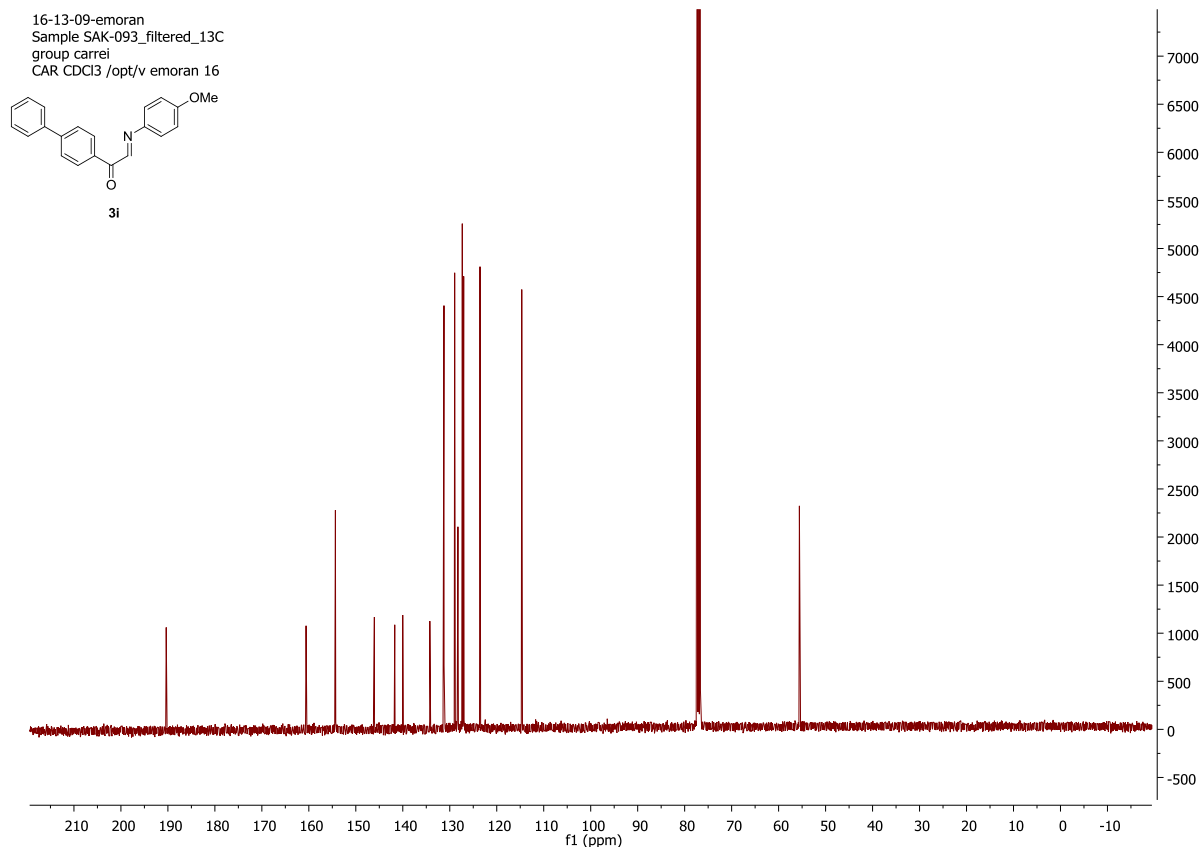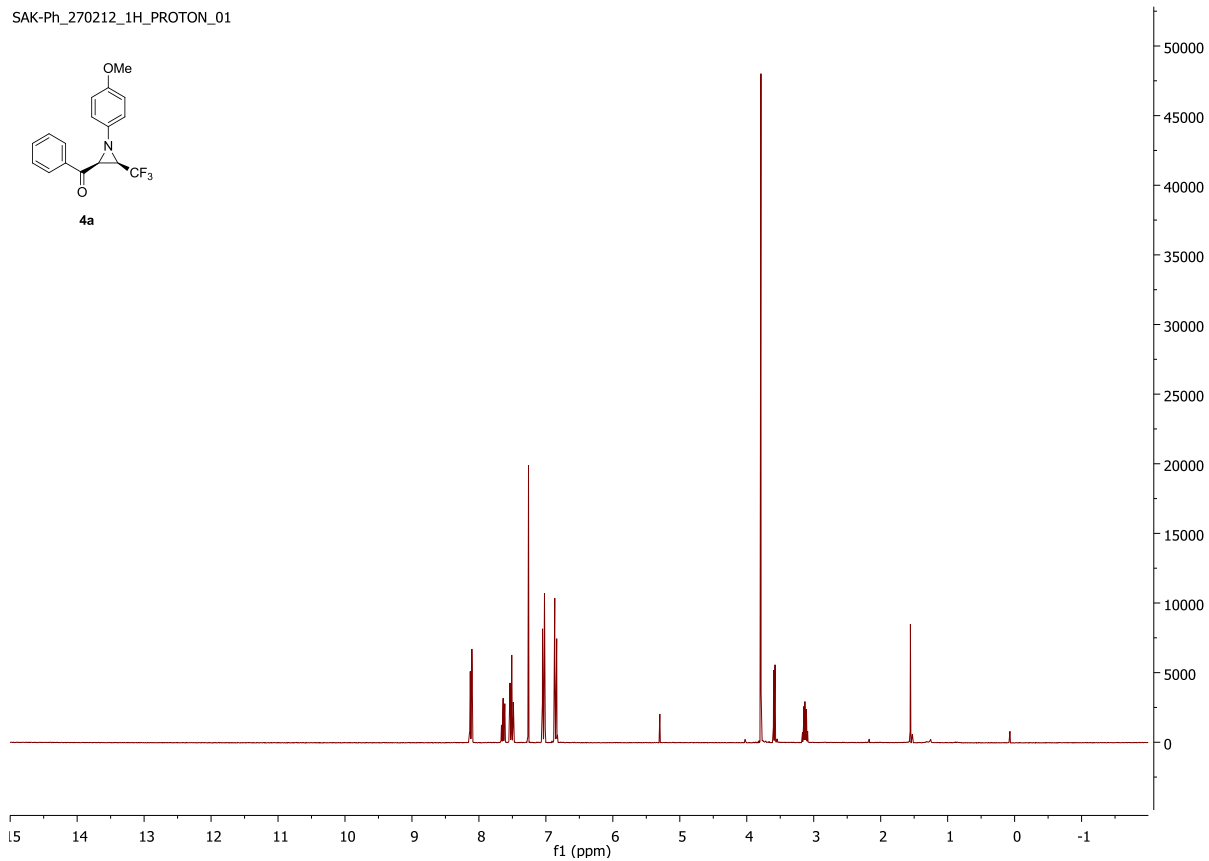

17-27-02-emoran  
Sample SAK-Ph\_270212\_13C  
group carrei  
CAR CDCl3 /opt/v emoran 17

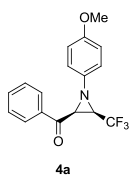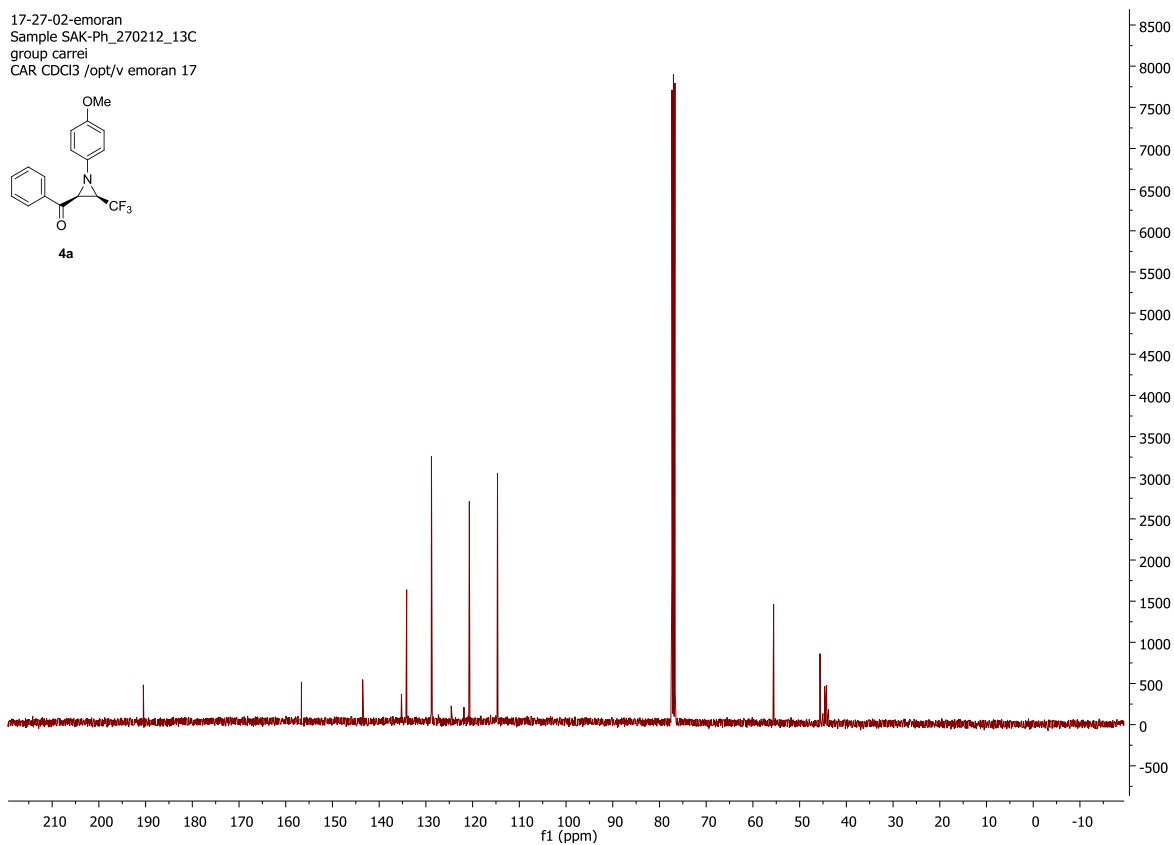

SAK-Ph\_270212\_19F\_FLUORINE\_01  
282MHz 19F-NMR

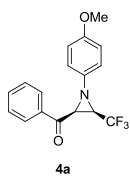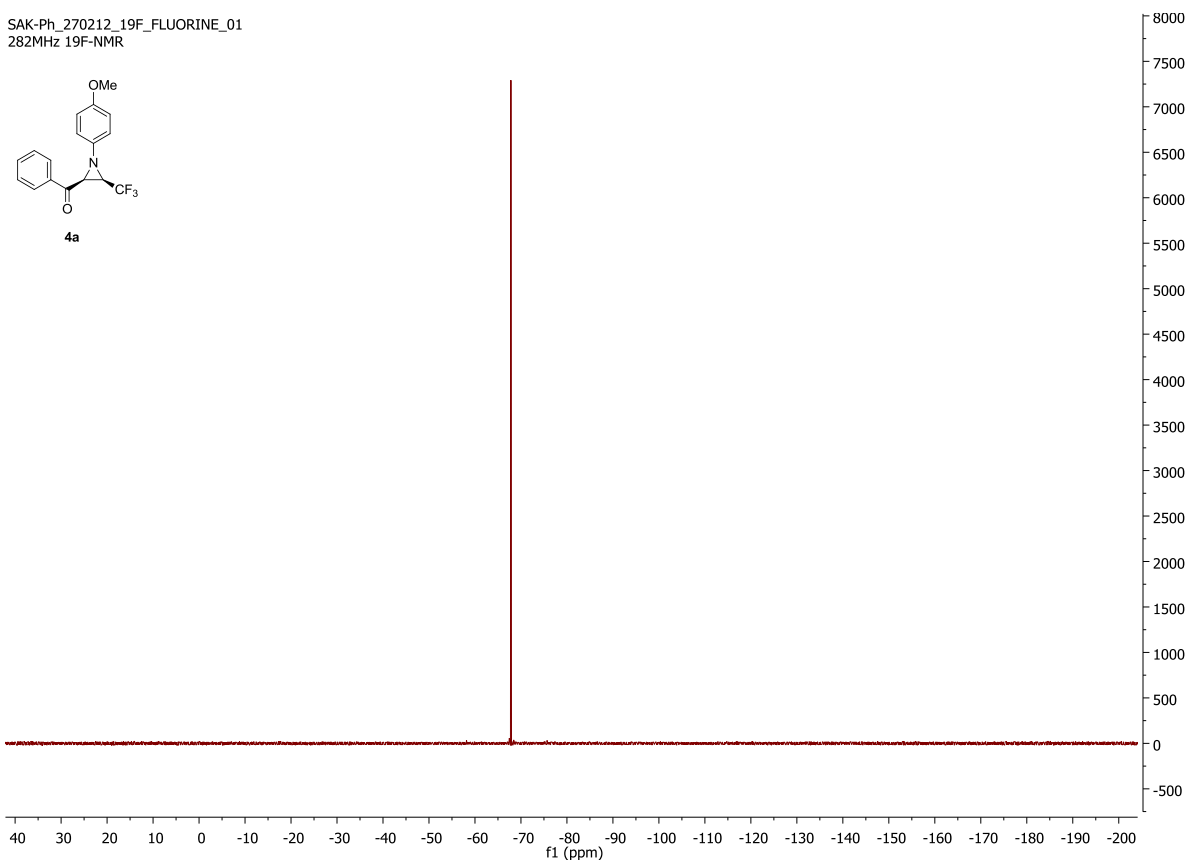

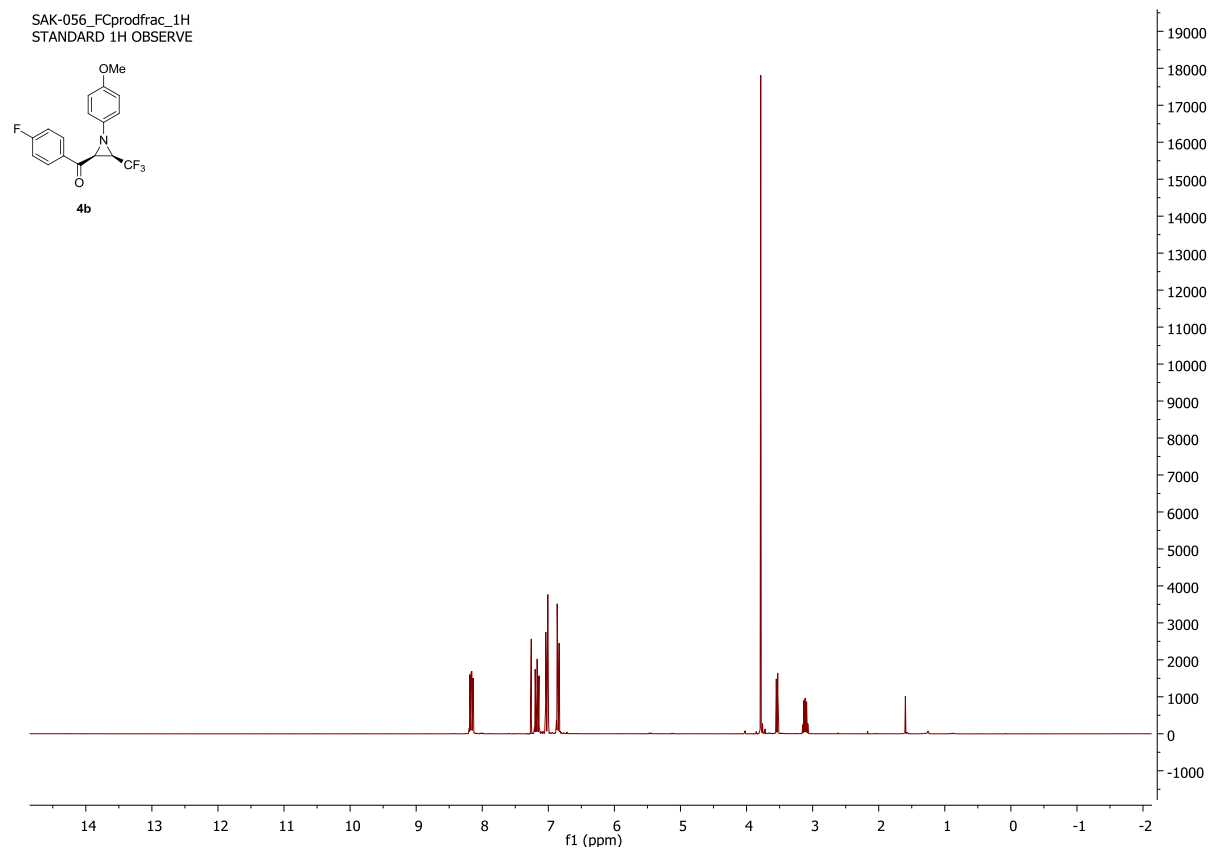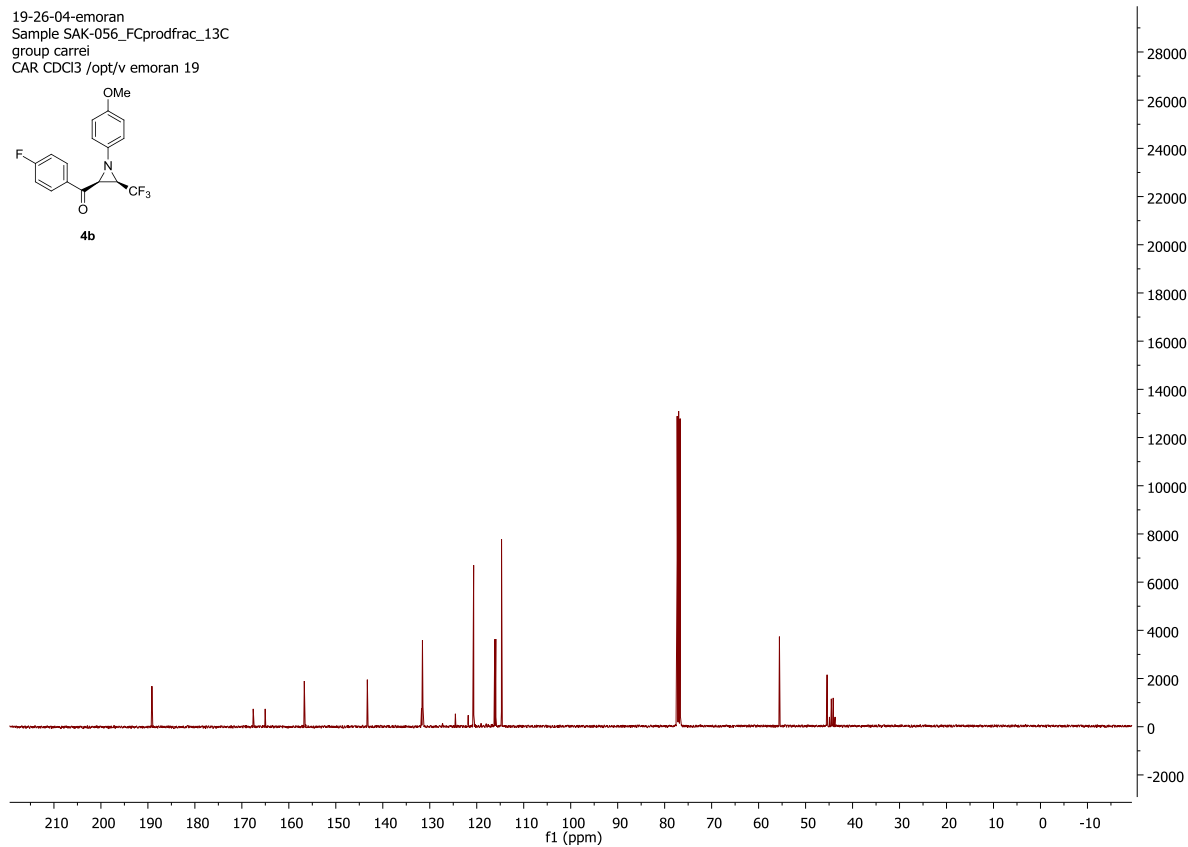

SAK-056\_FCprodfrac\_19F  
19F OBSERVE  
STANDARD PARAMETERS

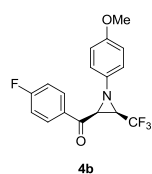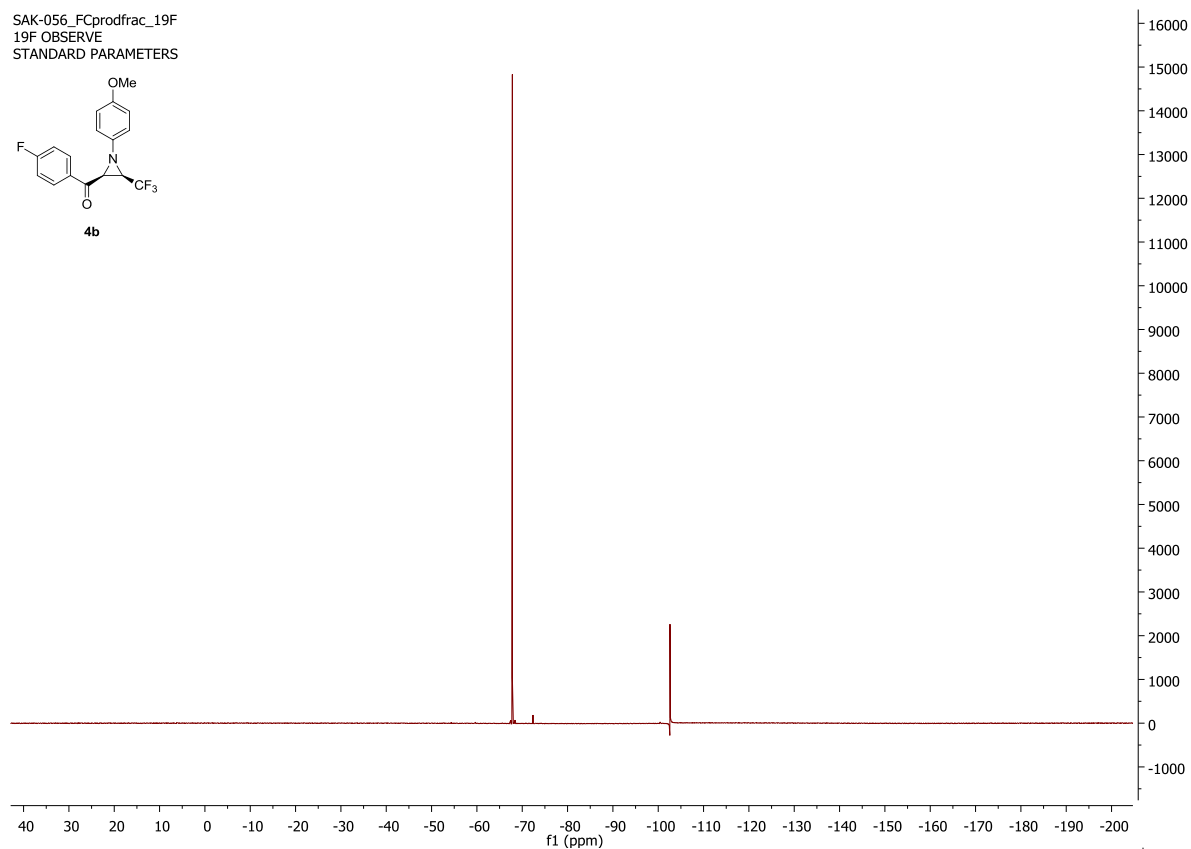

SAK-pMeO\_230212\_1H\_PROTON\_01

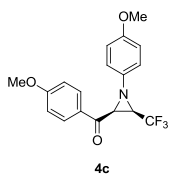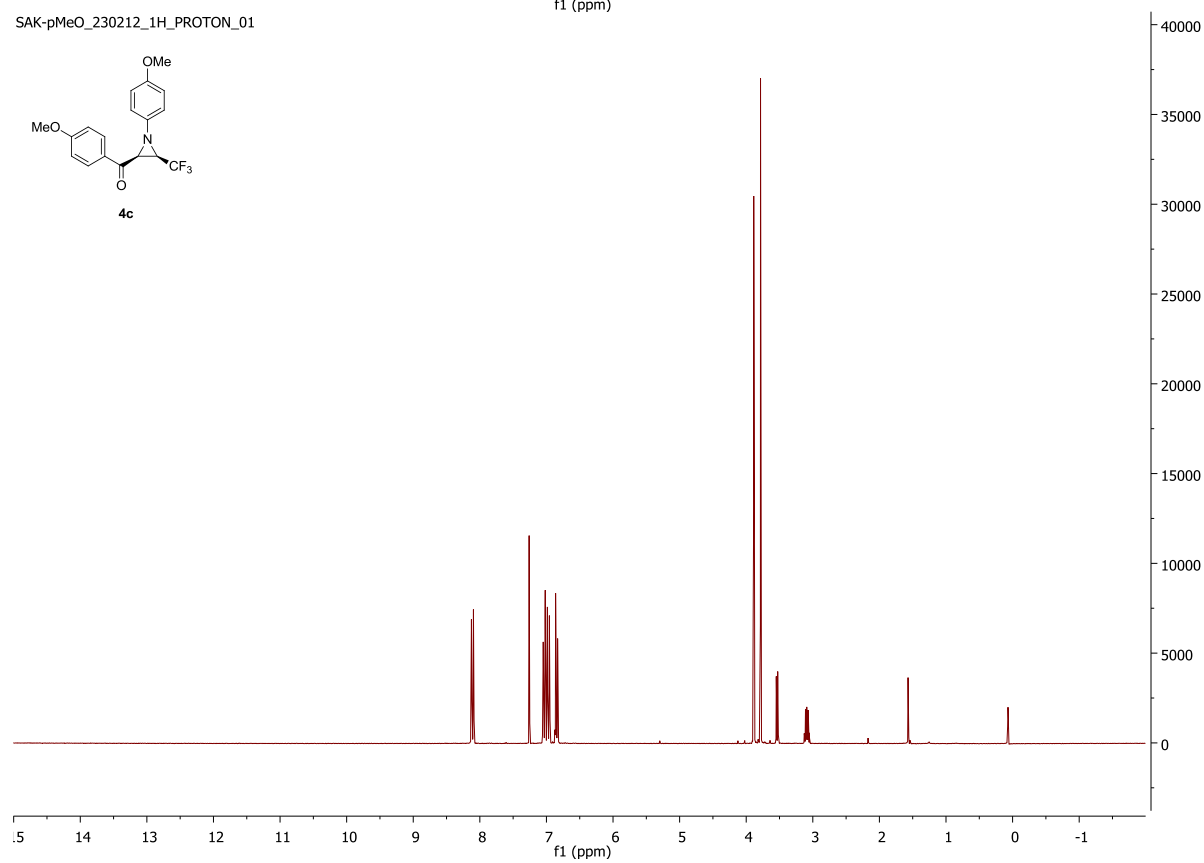

13-23-02-emoran  
 Sample SAK-pMeO\_230212\_13C  
 group carrei  
 CAR CDCl3 /opt/v emoran 13

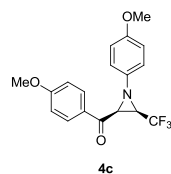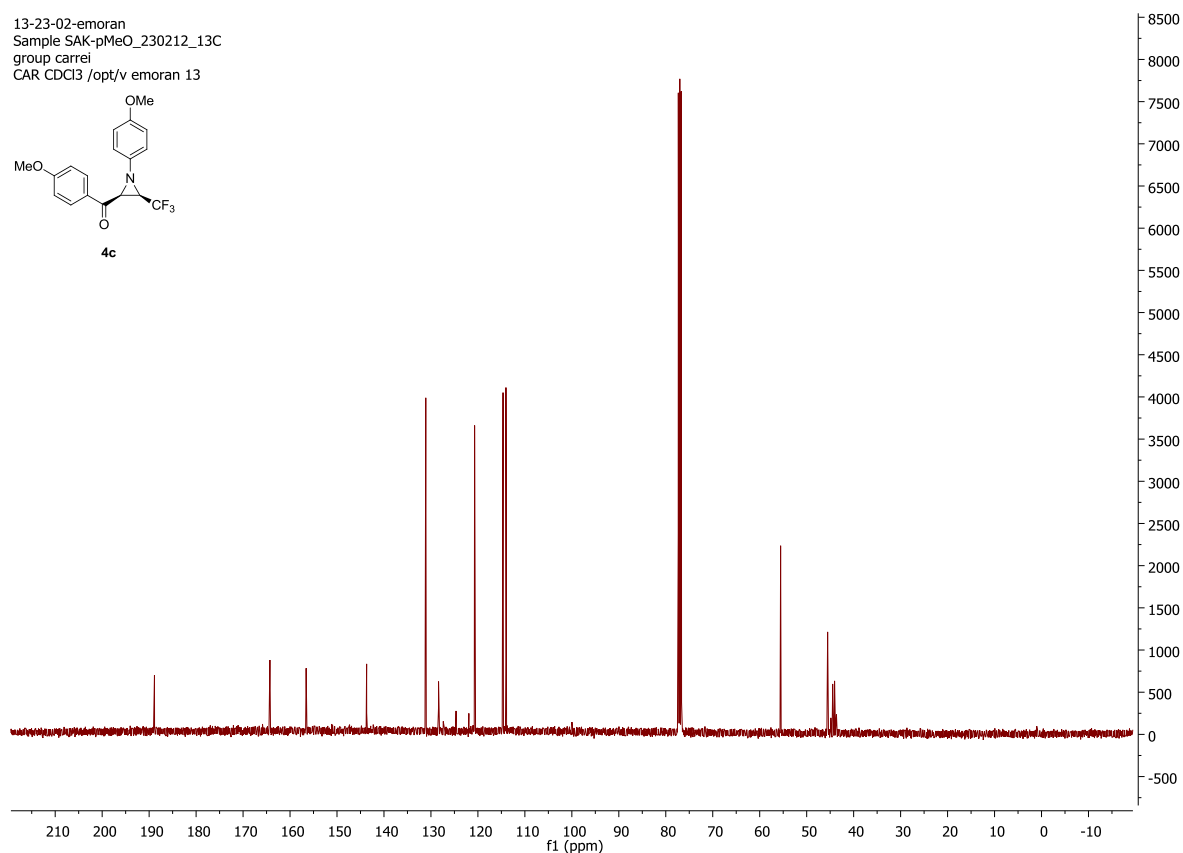

SAK-pMeO\_230212\_19F\_FLUORINE\_01  
 282MHz 19F-NMR

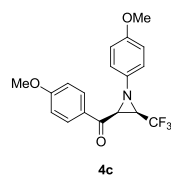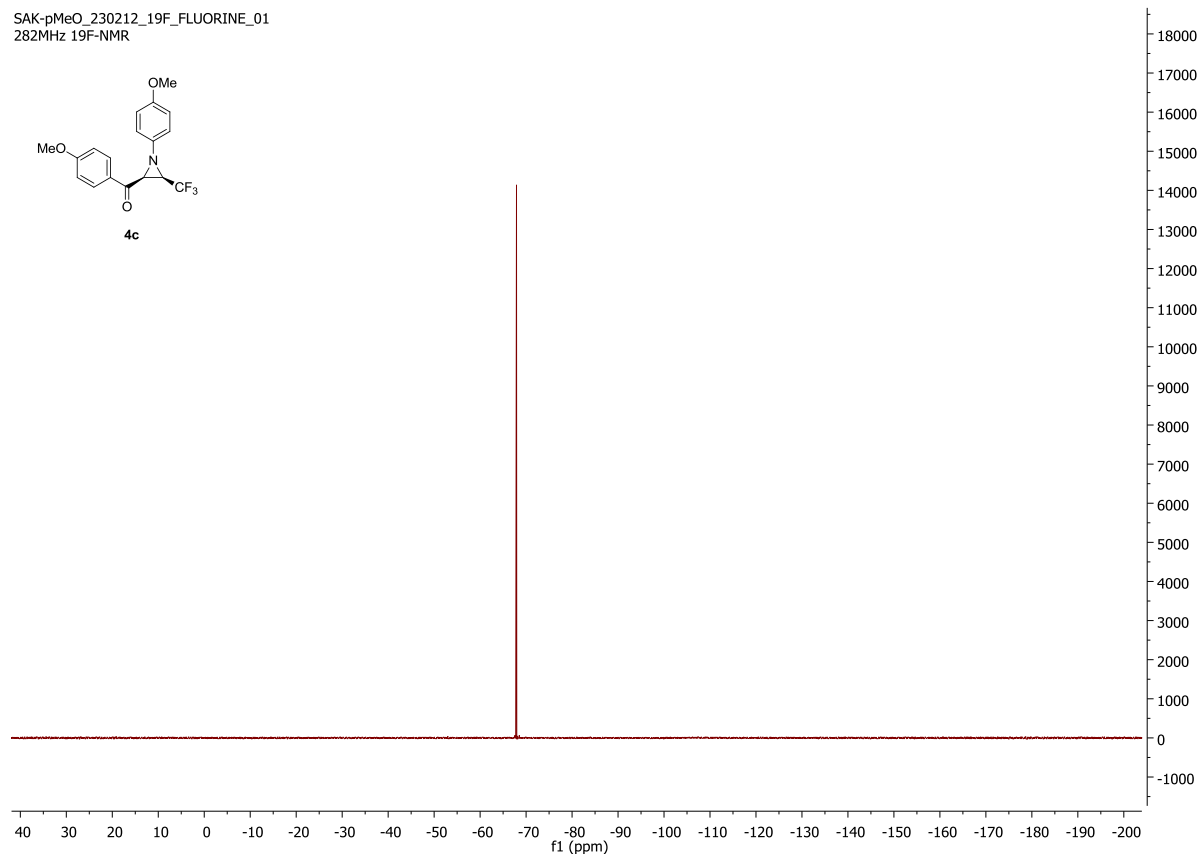

SAK-080\_FCfrac3\_1H  
STANDARD 1H OBSERVE

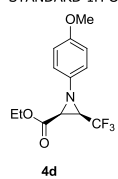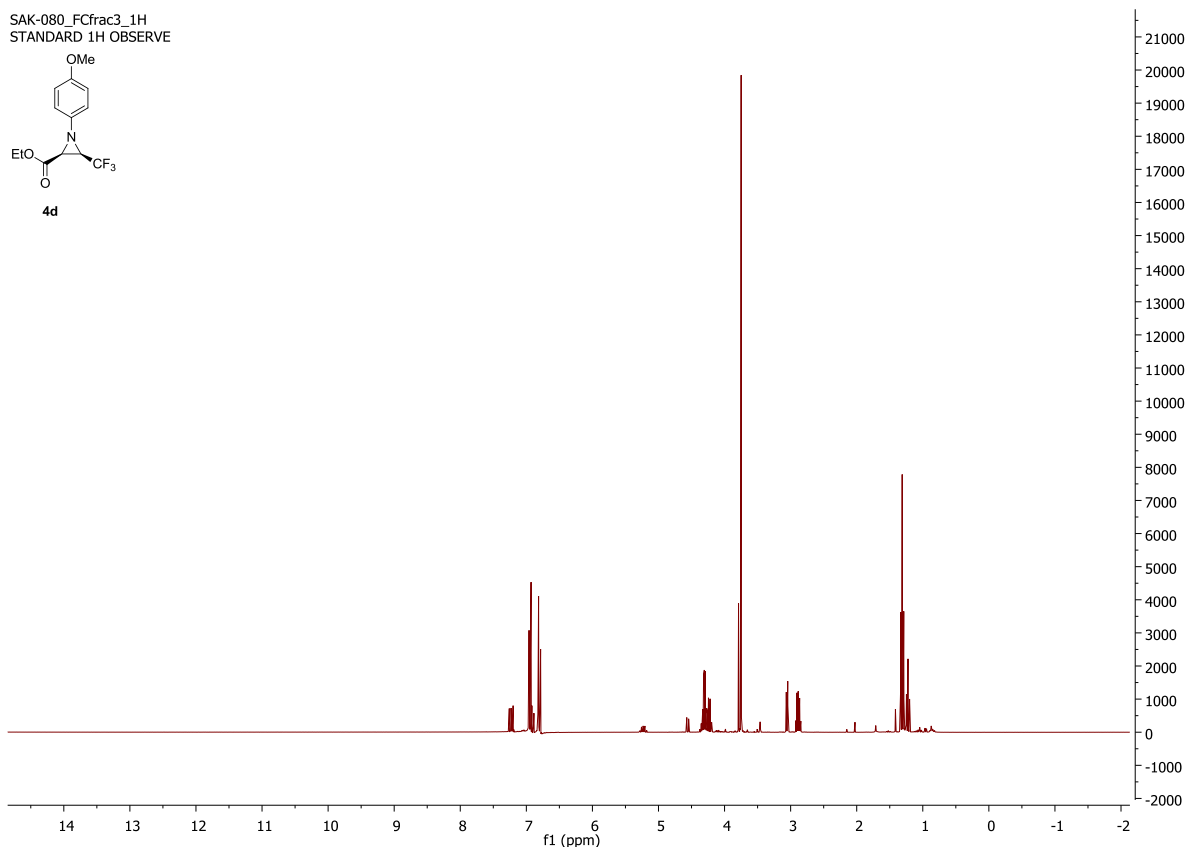

14-14-06-emoran  
Sample SAK-080\_FCfrac3\_13C  
group carrei  
CAR CDCl3 /opt/v emoran 14

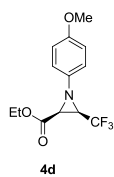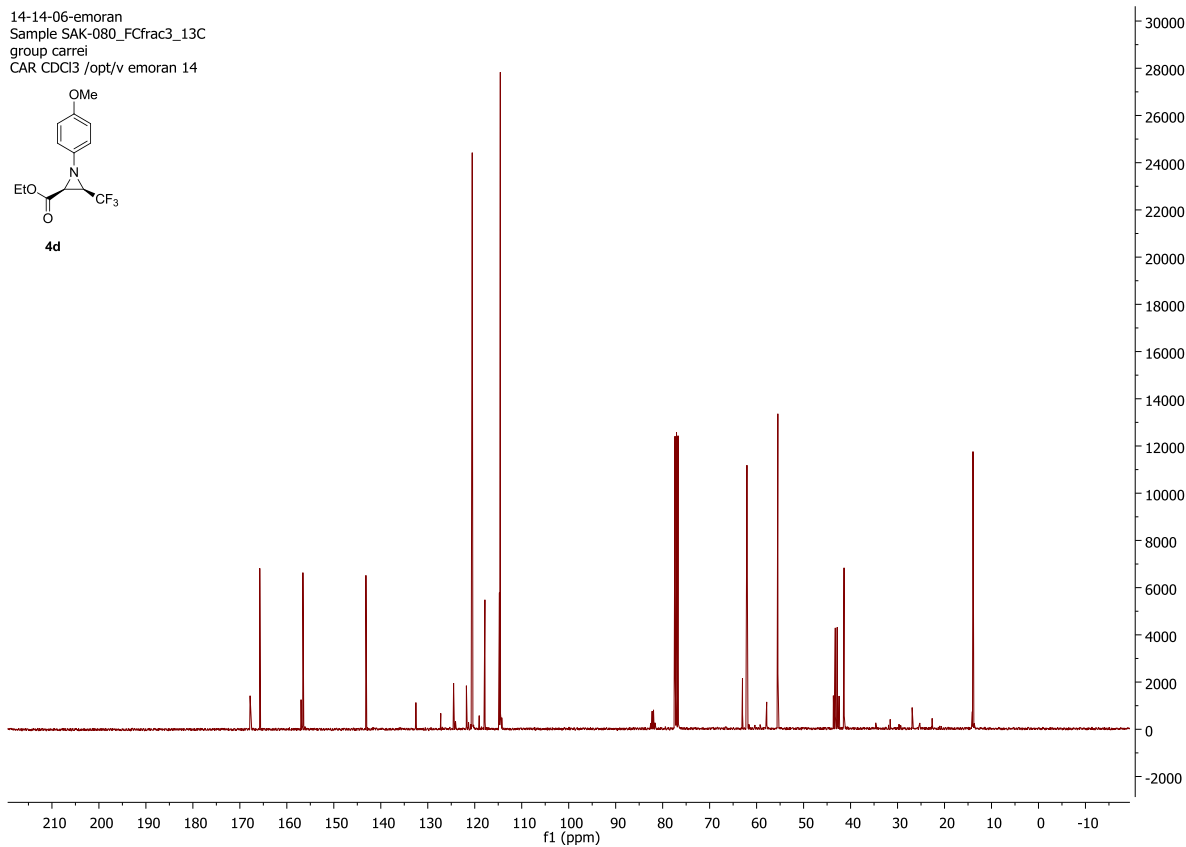

SAK-080\_FCfrac3\_19F  
19F OBSERVE  
STANDARD PARAMETERS

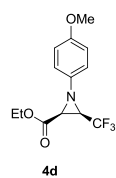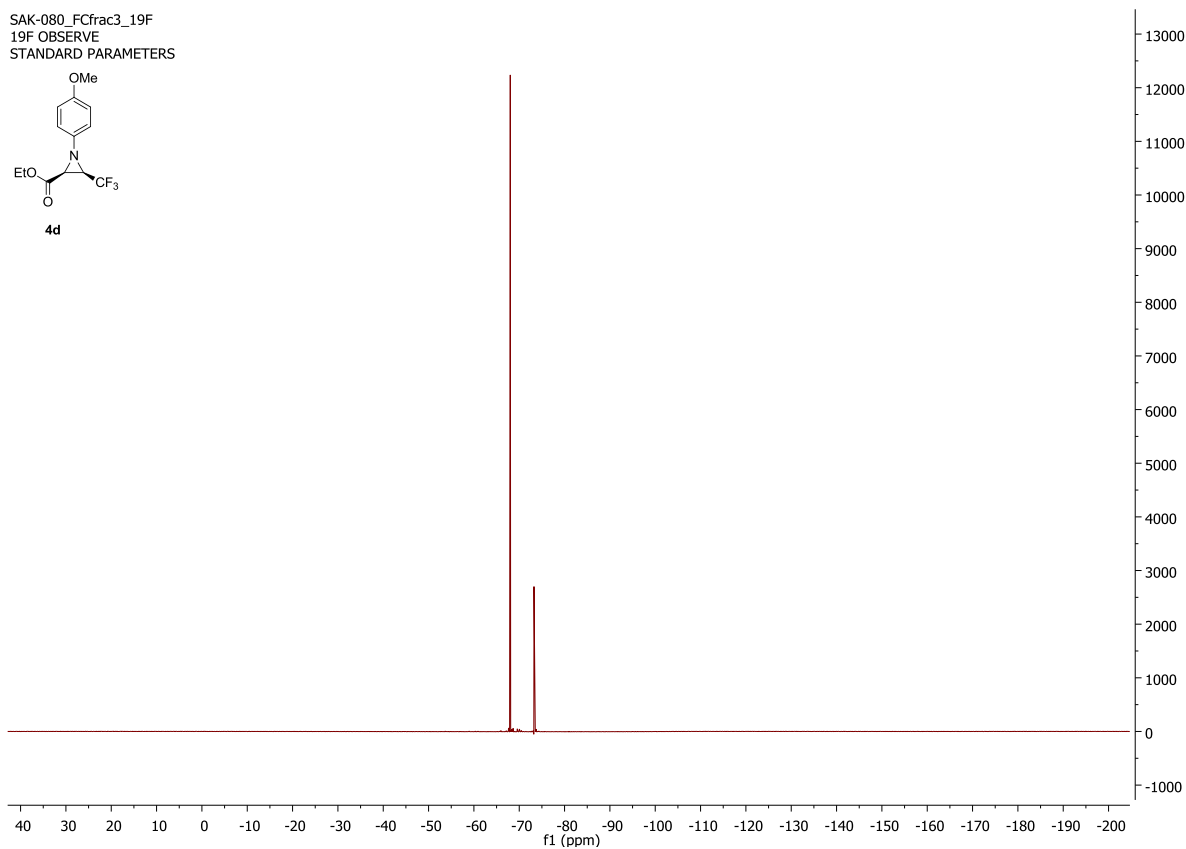

SAK-mCl\_240212\_1H\_PROTON\_01

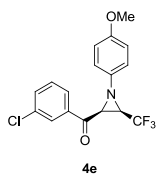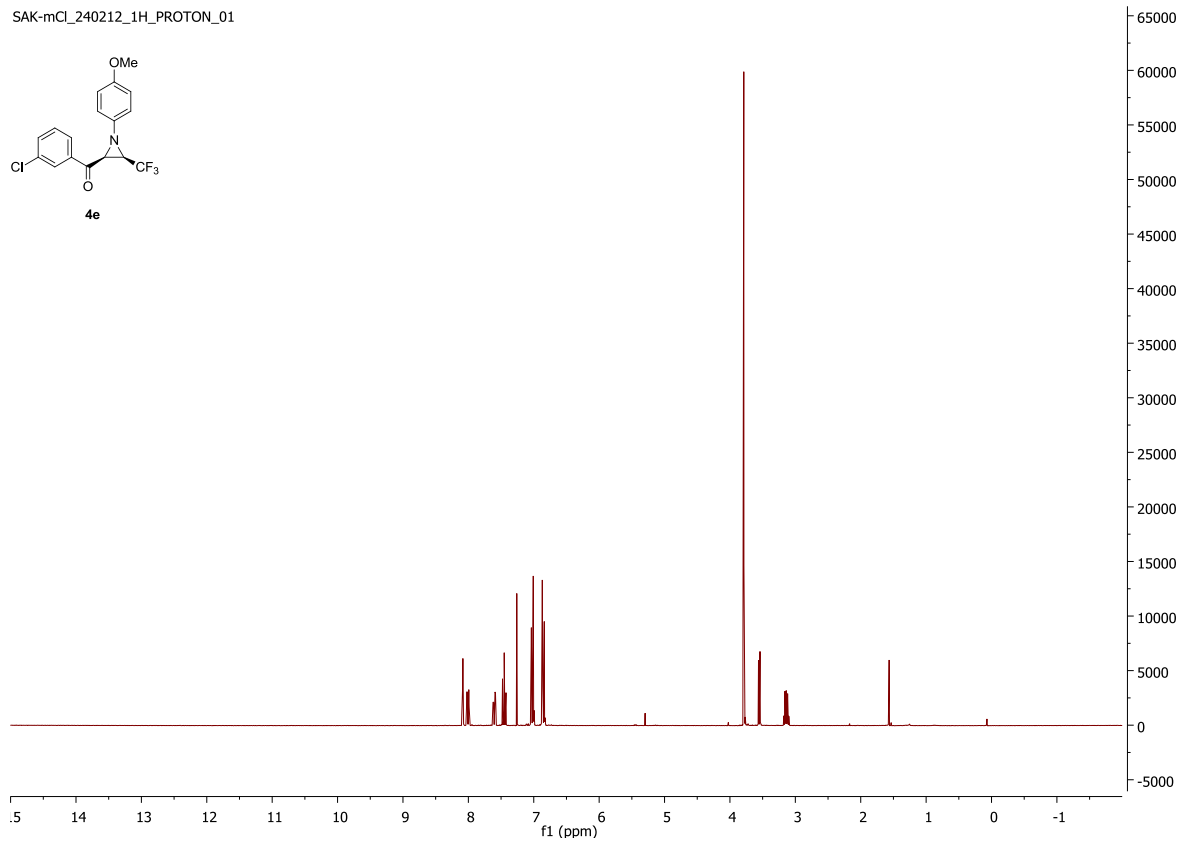

52-24-02-emoran  
 Sample SAK-mCl\_240212\_13C  
 group carrei  
 CAR CDCl3 /opt/v emoran 52

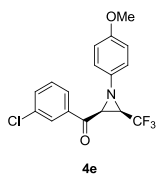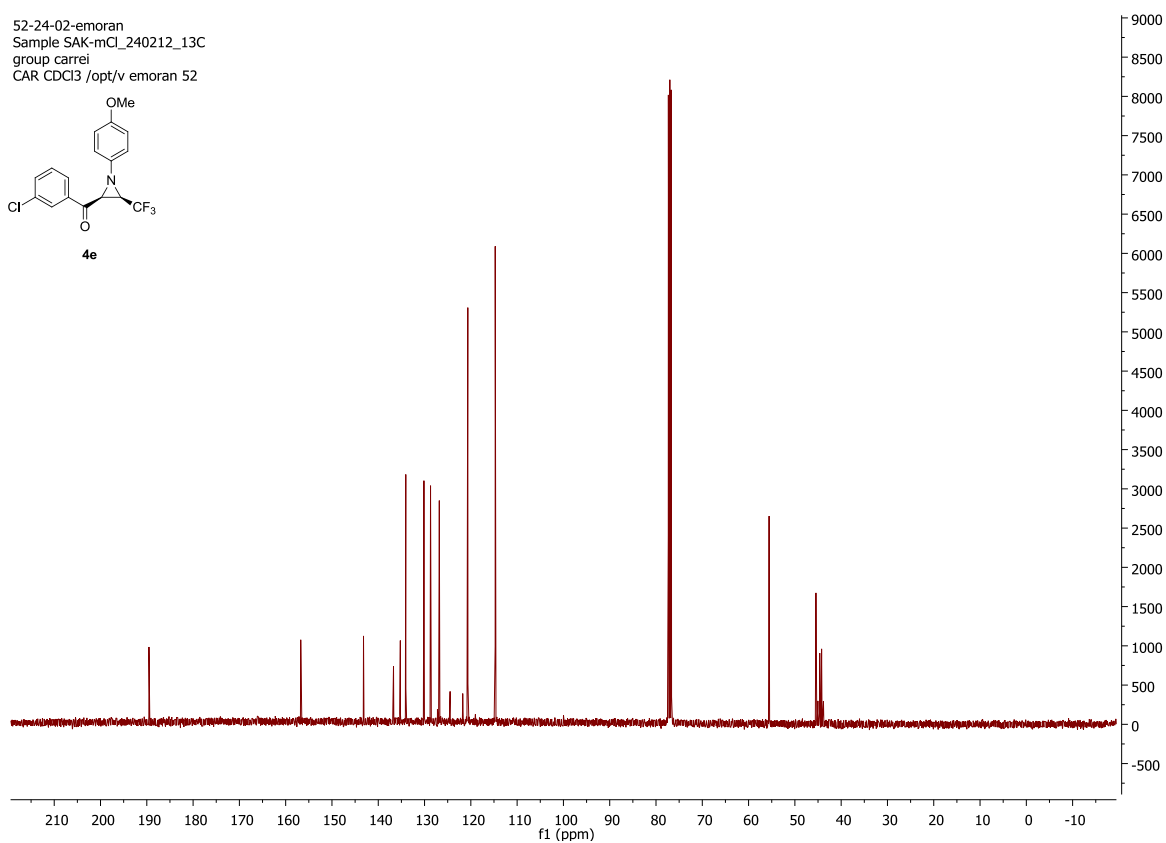

SAK-mCl\_240212\_19F\_FLUORINE\_01  
 282MHz 19F-NMR

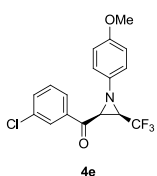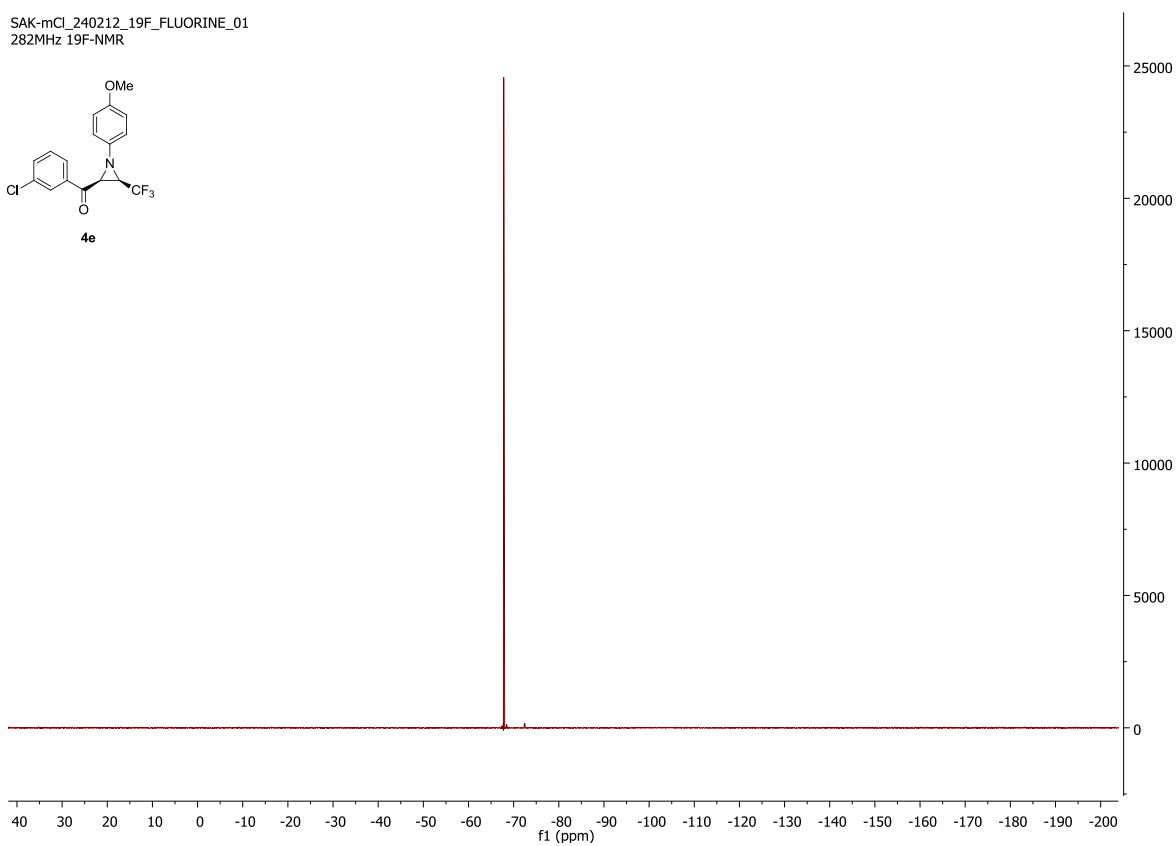



SAK-062\_prod120911\_1H  
STANDARD 1H OBSERVE

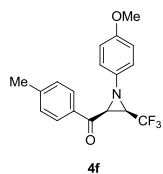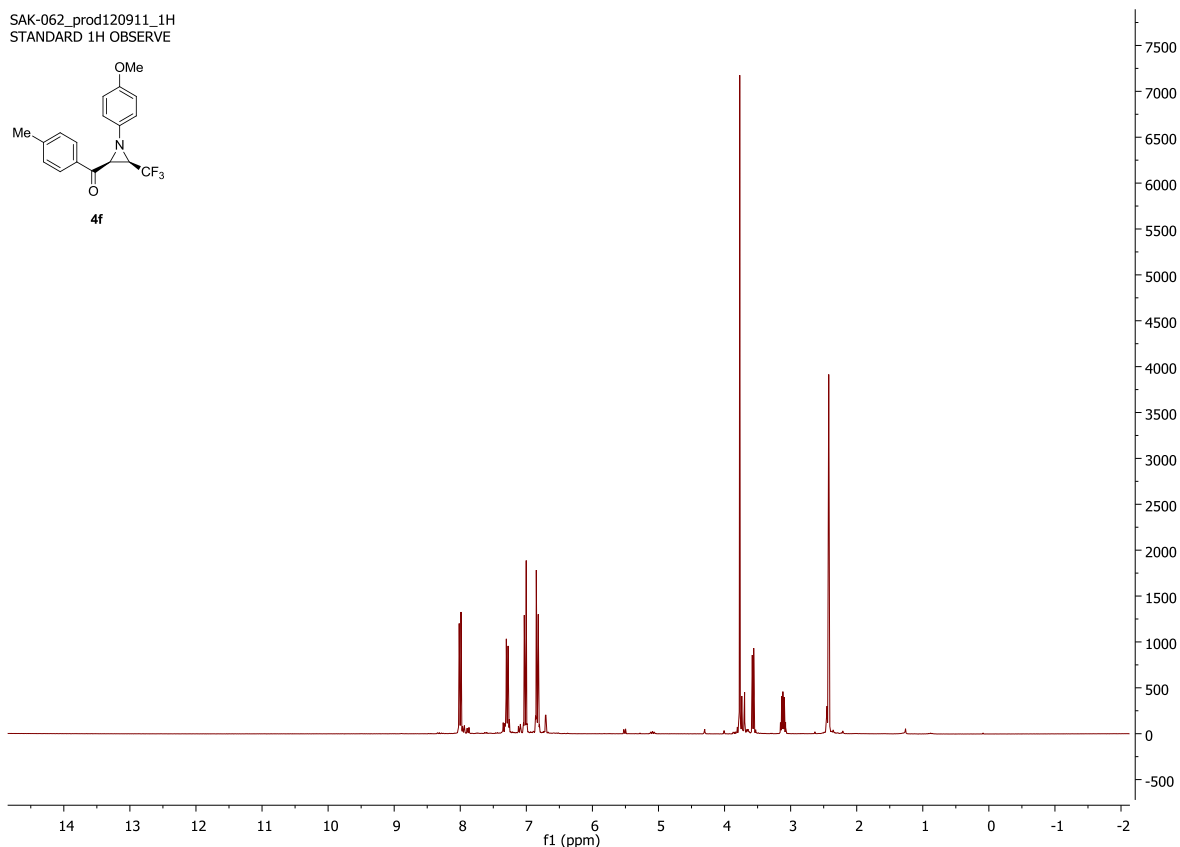

41-12-09-emoran  
Sample SAK-062\_prod120911\_13C  
group carrei  
CAR CDCl3 /opt/v emoran 41

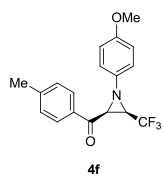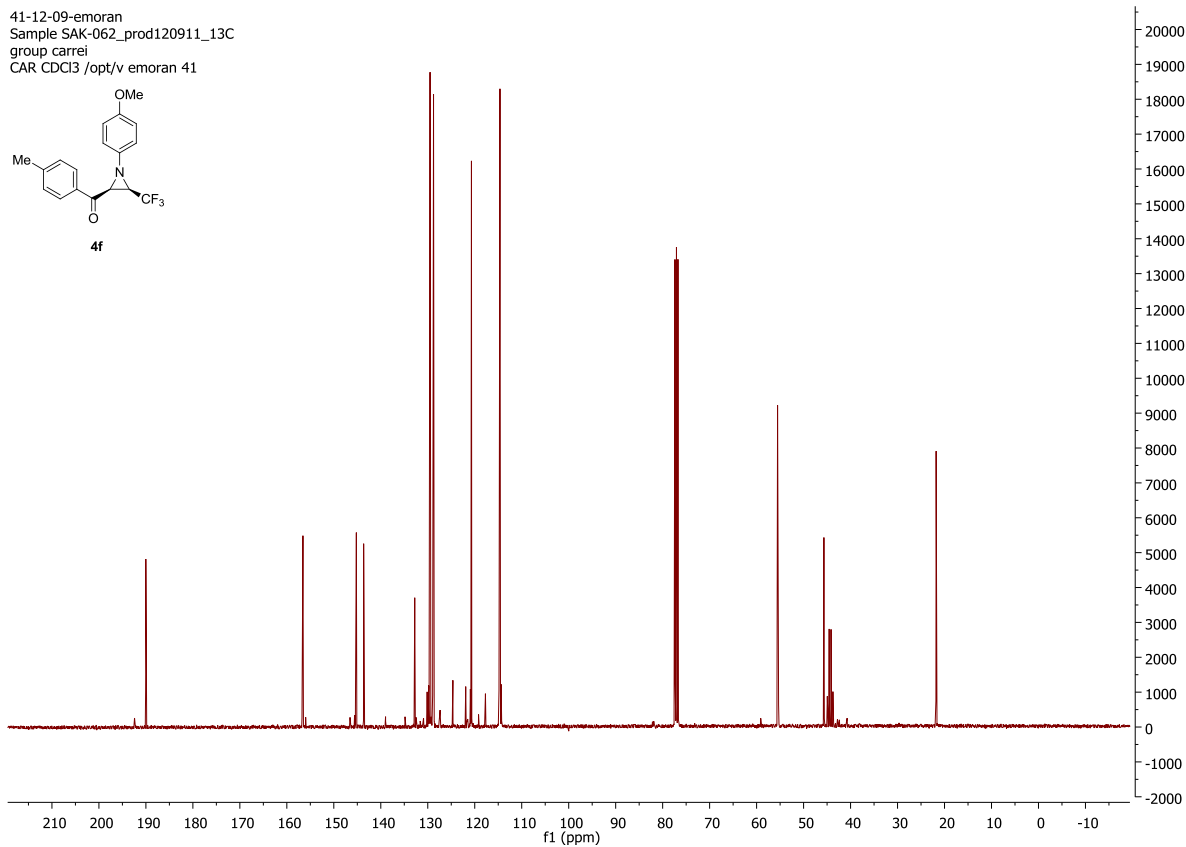

SAK-062\_prod120911\_19F  
19F OBSERVE  
STANDARD PARAMETERS

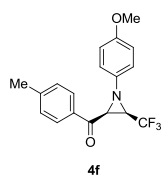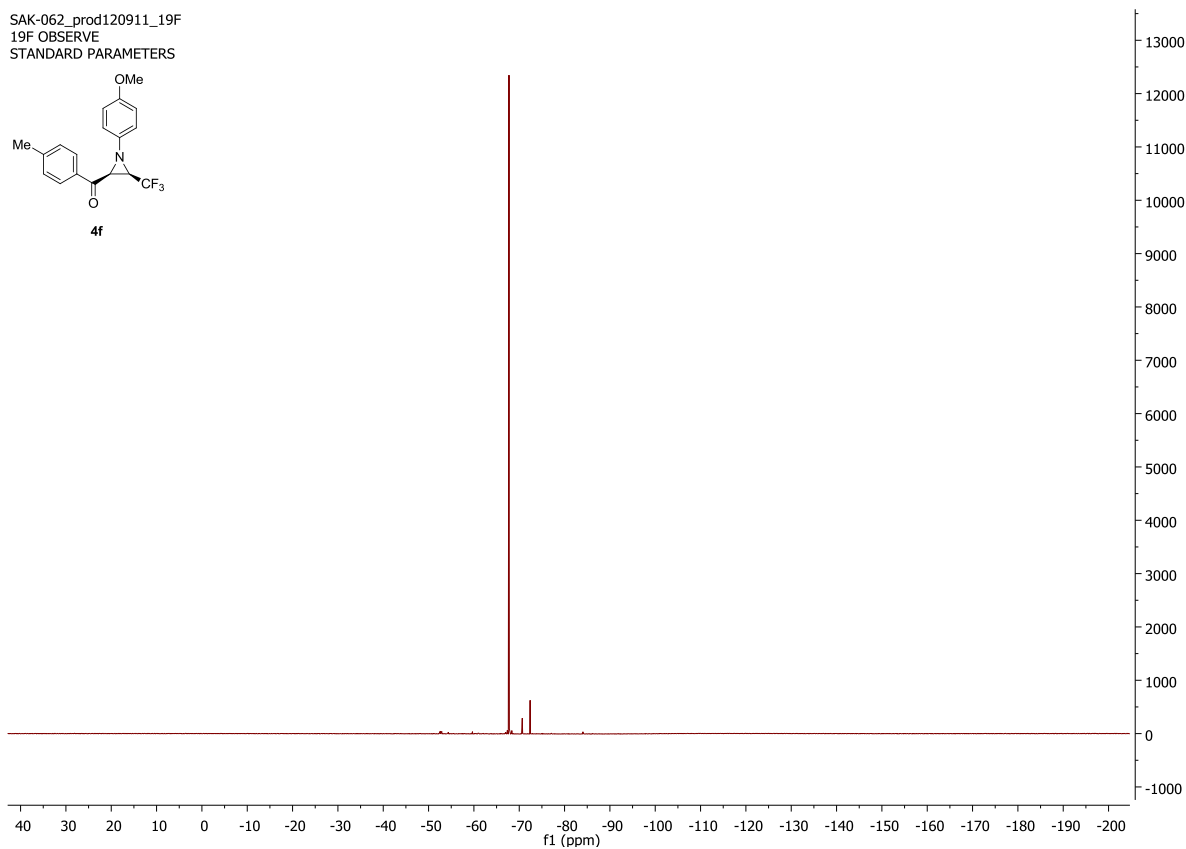

SAK-092\_FCfrac3\_1H  
STANDARD 1H OBSERVE

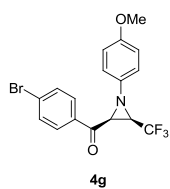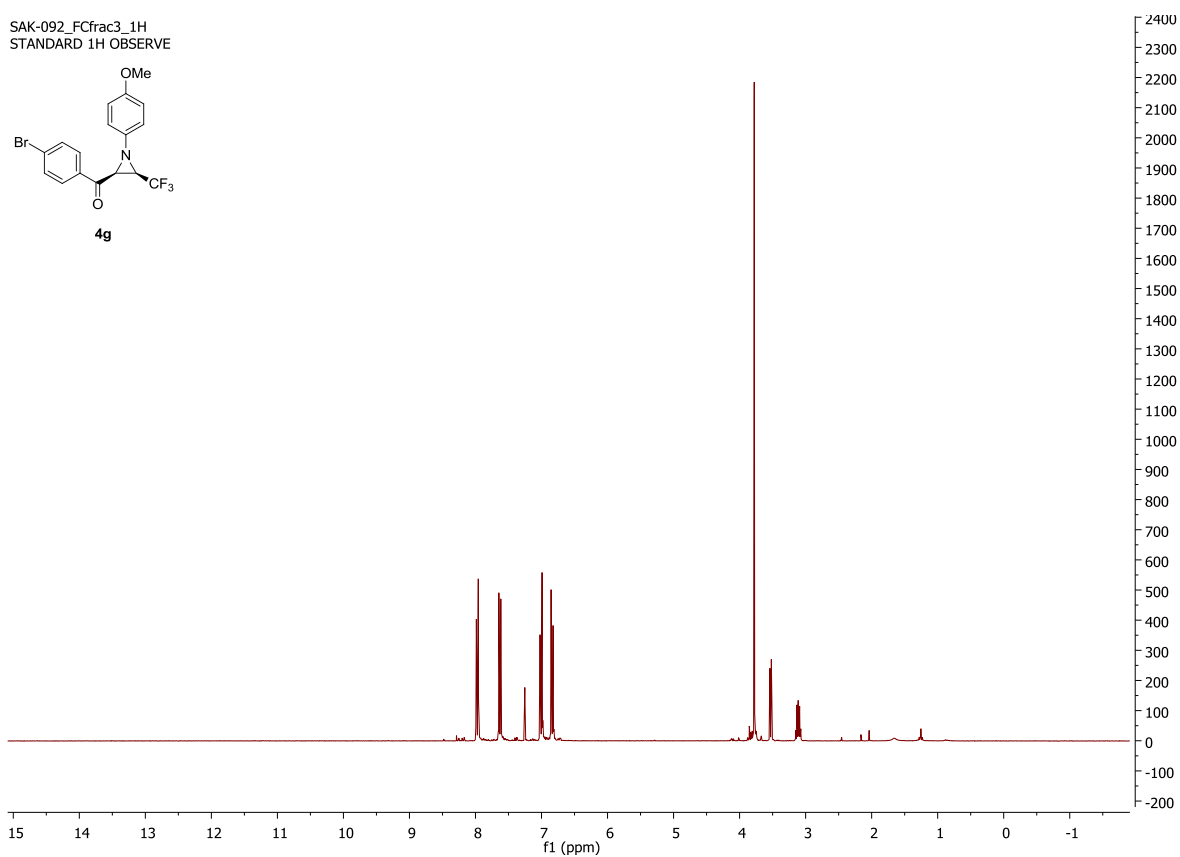

7-13-09-emoran  
 Sample SAK-092\_FCfrac3\_13C  
 group carrei  
 CAR CDCl3 /opt/v emoran 7

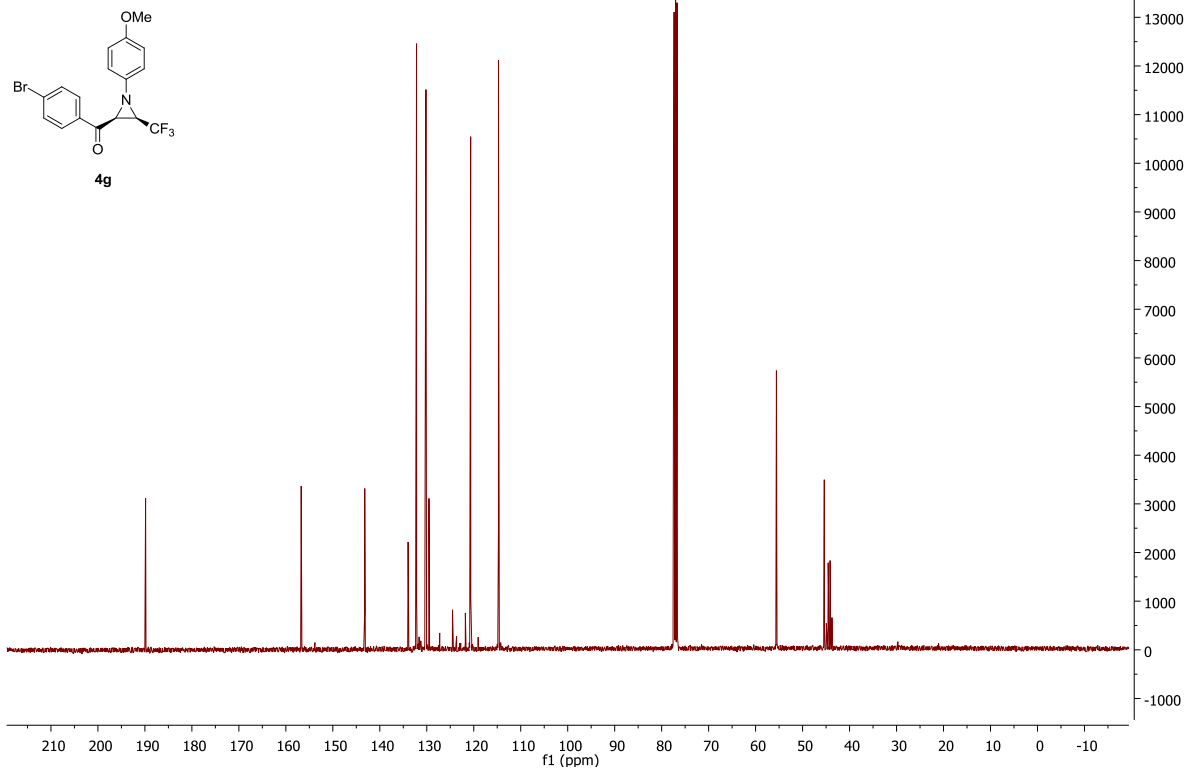

SAK-092\_FCfrac3\_19F  
 19F OBSERVE  
 STANDARD PARAMETERS

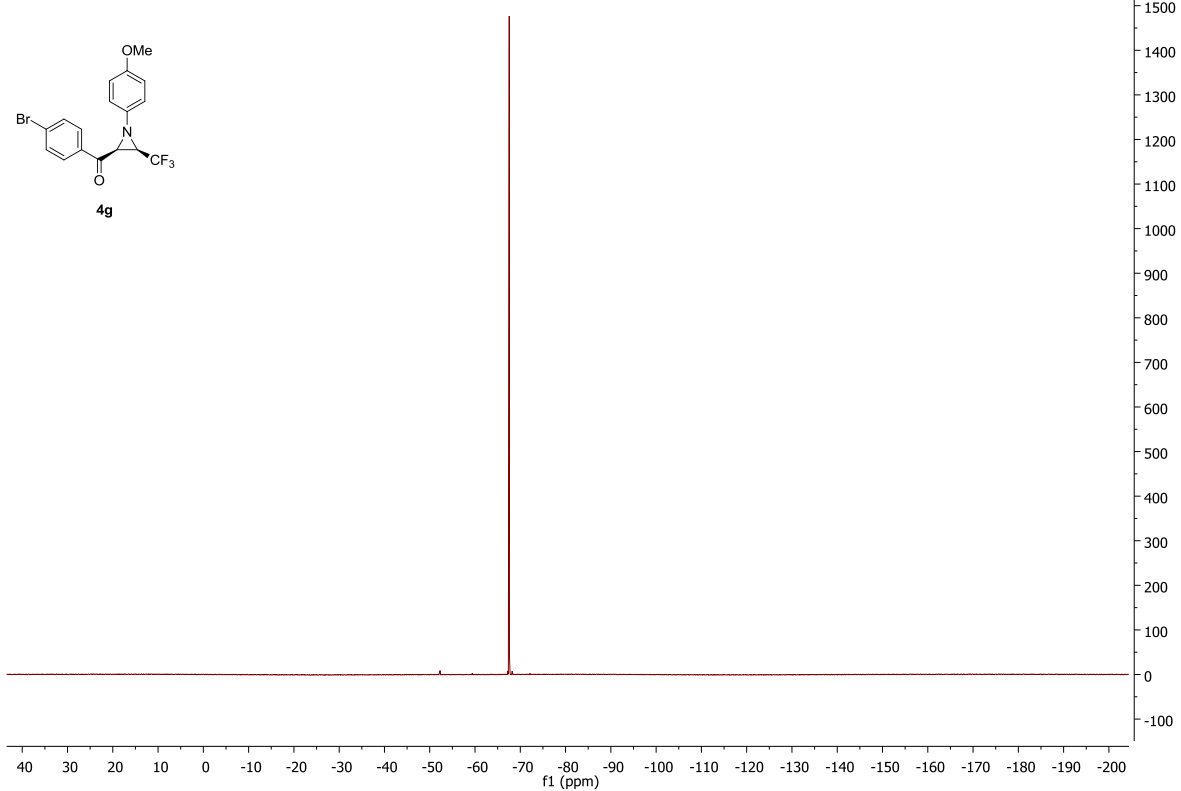

SAK-071\_FC\_frac2\_1H  
STANDARD 1H OBSERVE

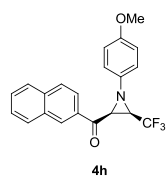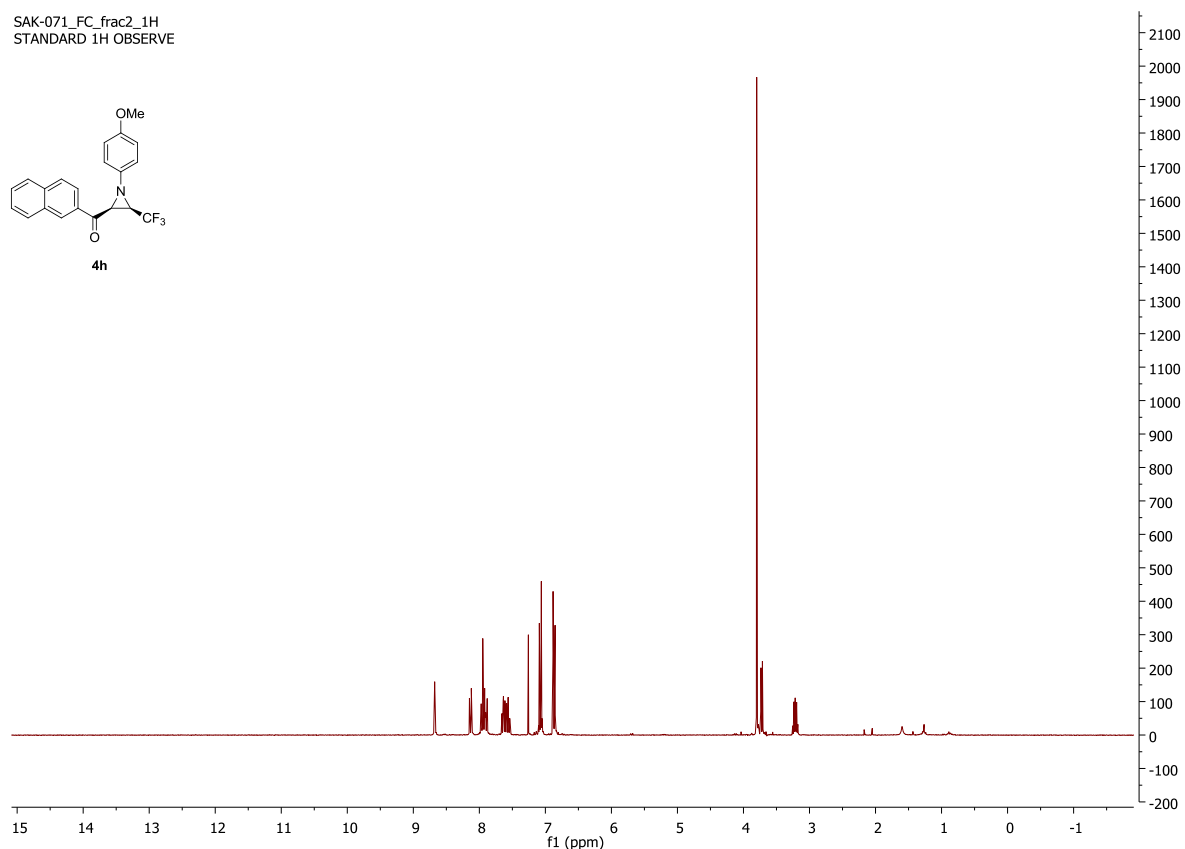

24-23-05-emoran  
Sample SAK-071\_FC\_frac2\_13C  
group carrei  
CAR CDCl<sub>3</sub> /opt/v emoran 24

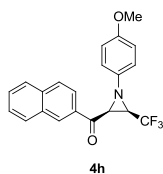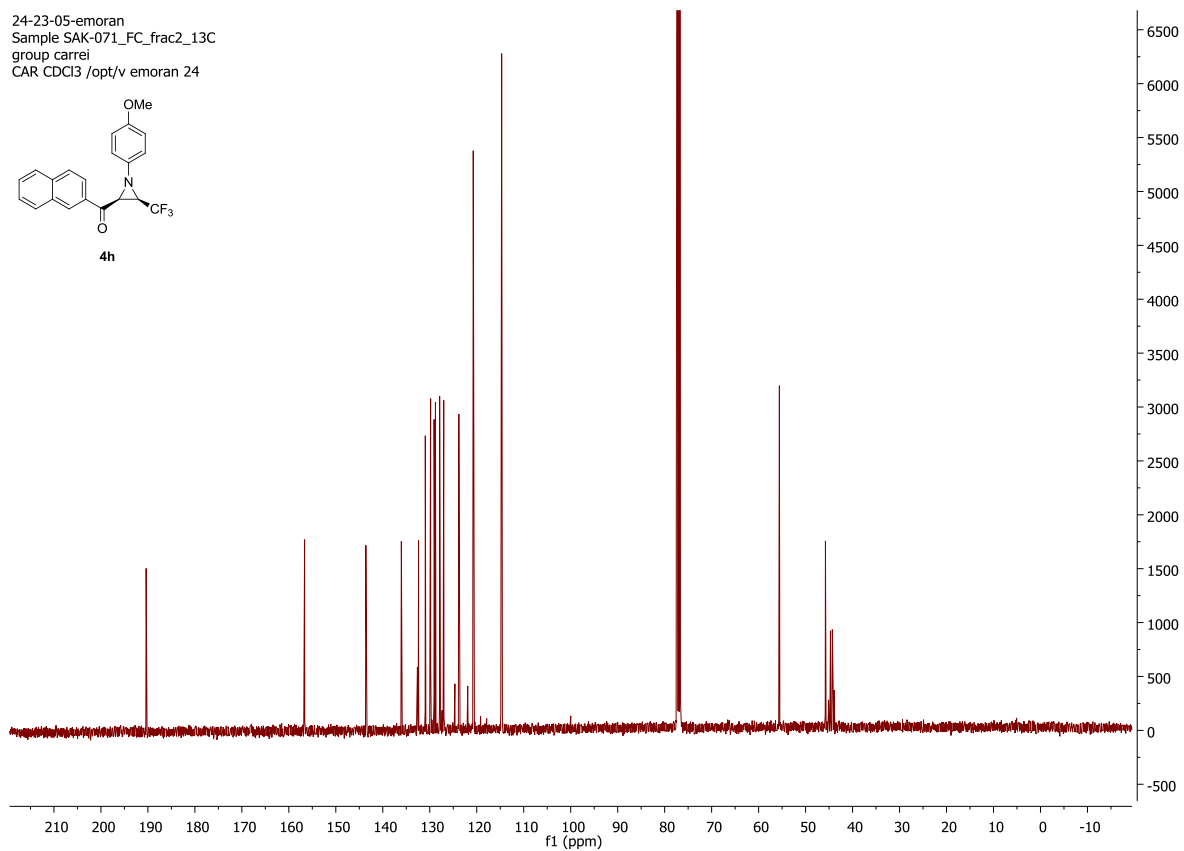

SAK-071\_FC\_frac2\_19F  
19F OBSERVE  
STANDARD PARAMETERS

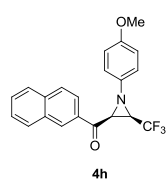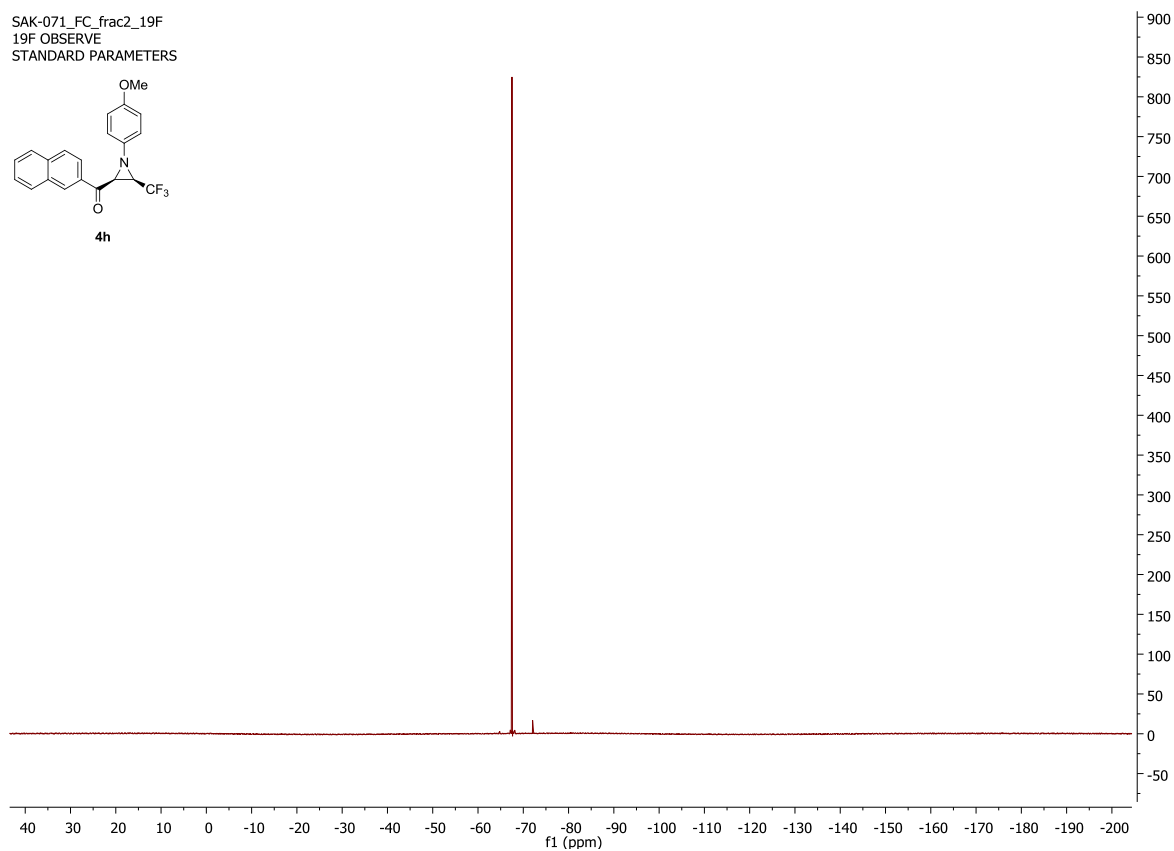

SAK-096\_FCprodfrac2\_1H  
STANDARD 1H OBSERVE

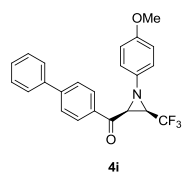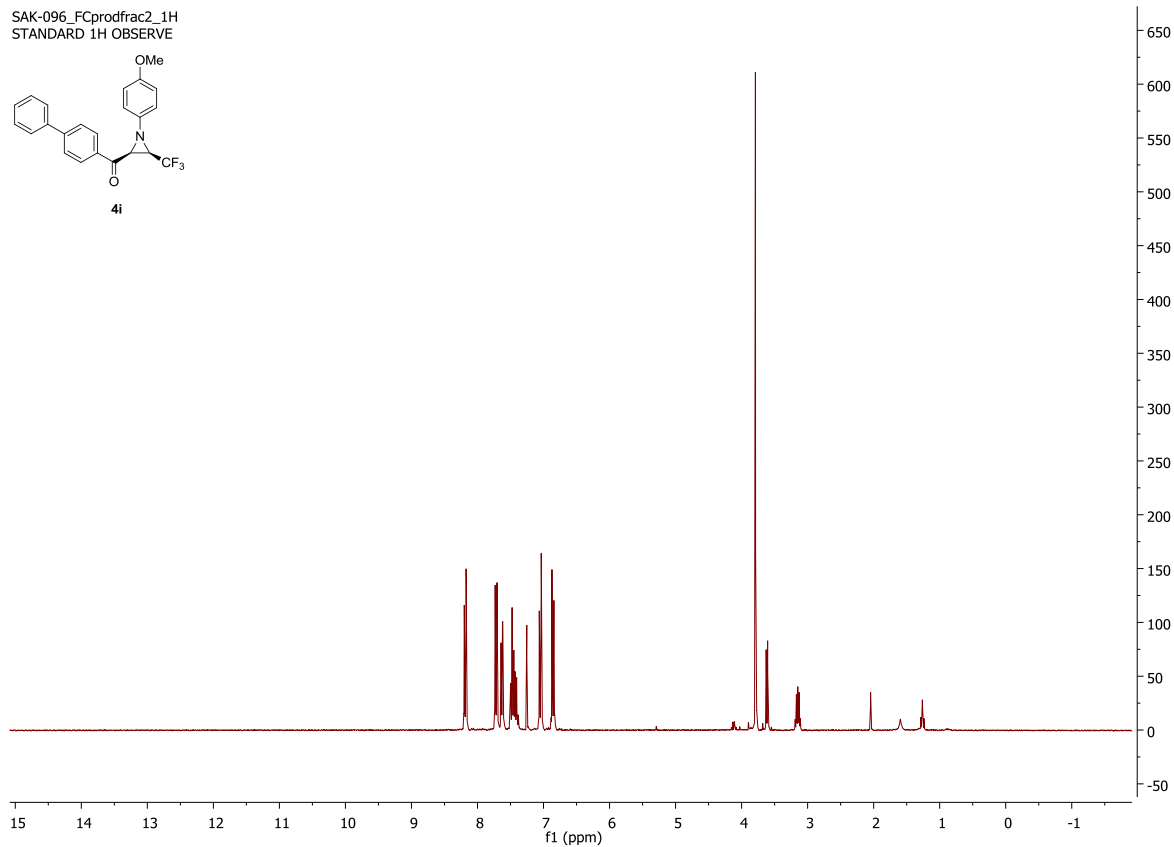

55-15-09-emoran  
 Sample SAK-096\_FCprodfrac2\_13C  
 group carrei  
 CAR CDCl3 /opt/v emoran 55

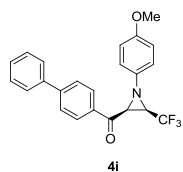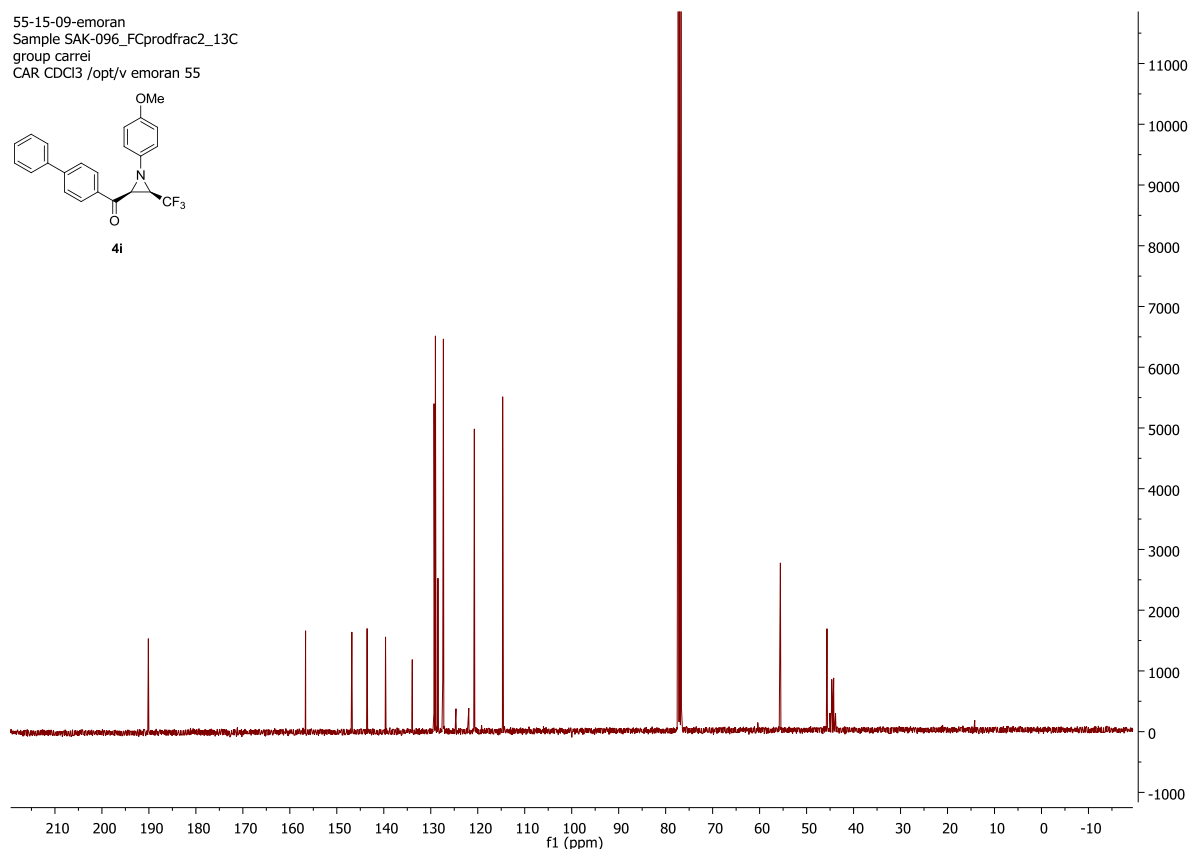

SAK-096\_FCprodfrac2\_19F  
 19F OBSERVE  
 STANDARD PARAMETERS

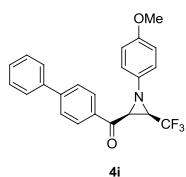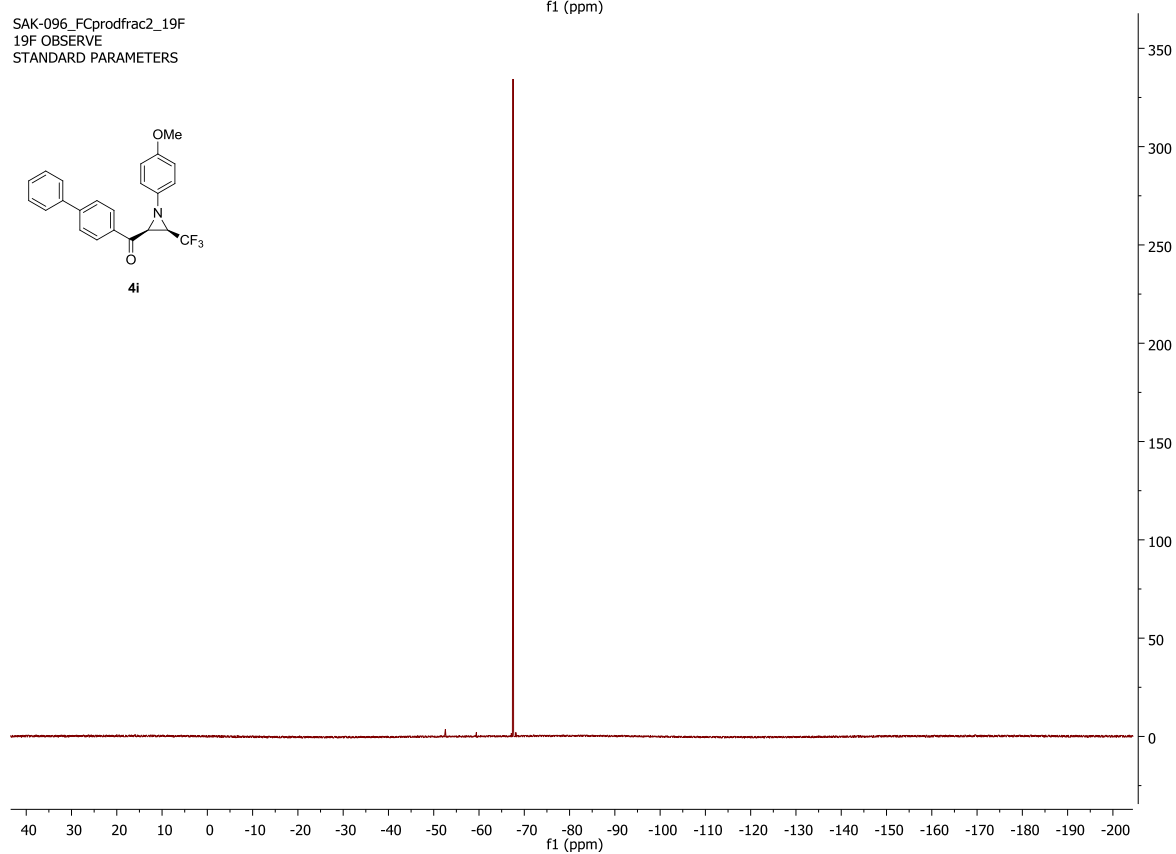

SAK-095\_prepTLC\_CD3CN\_1H  
STANDARD 1H OBSERVE

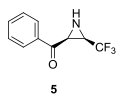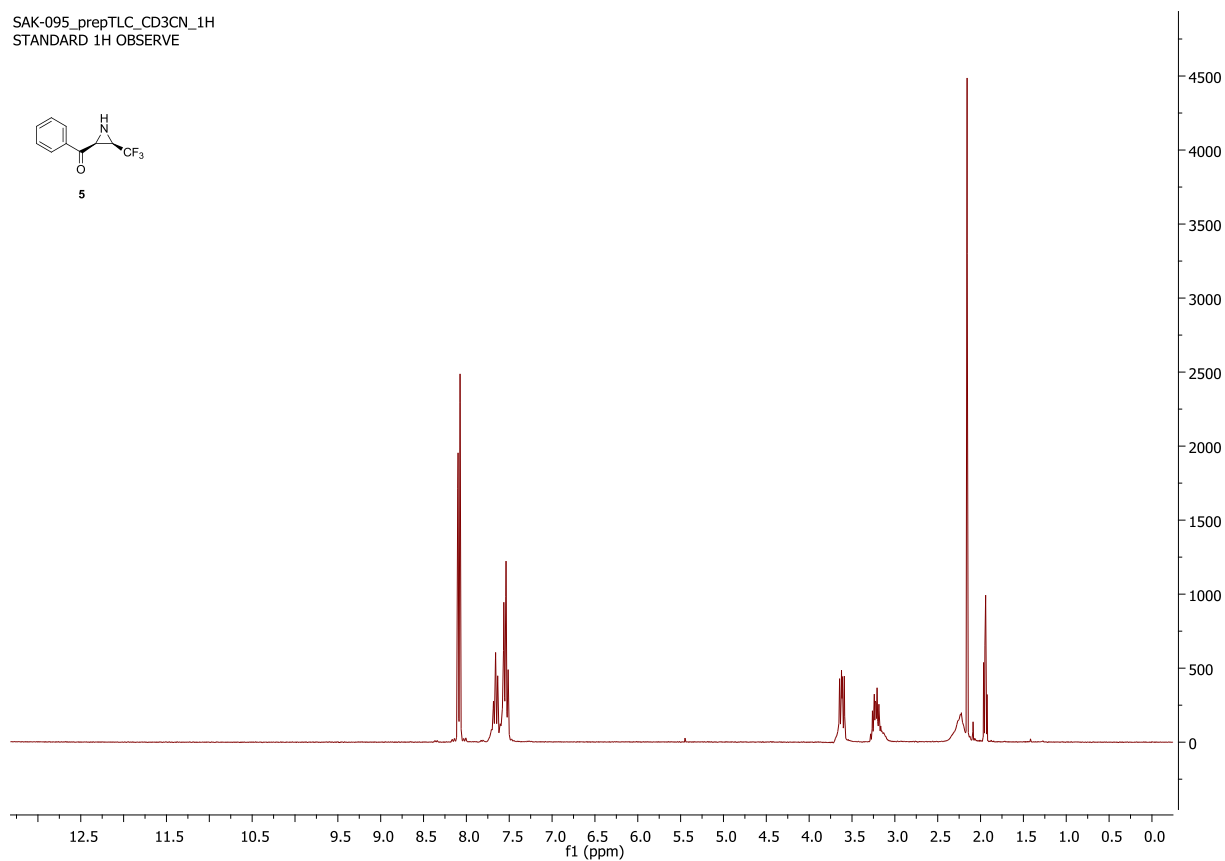

6-20-09-emoran  
Sample SAK-095\_prepTLC\_CD3CN\_13C  
group carrel  
CAR CD3CN /opt/v emoran 6

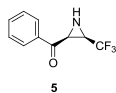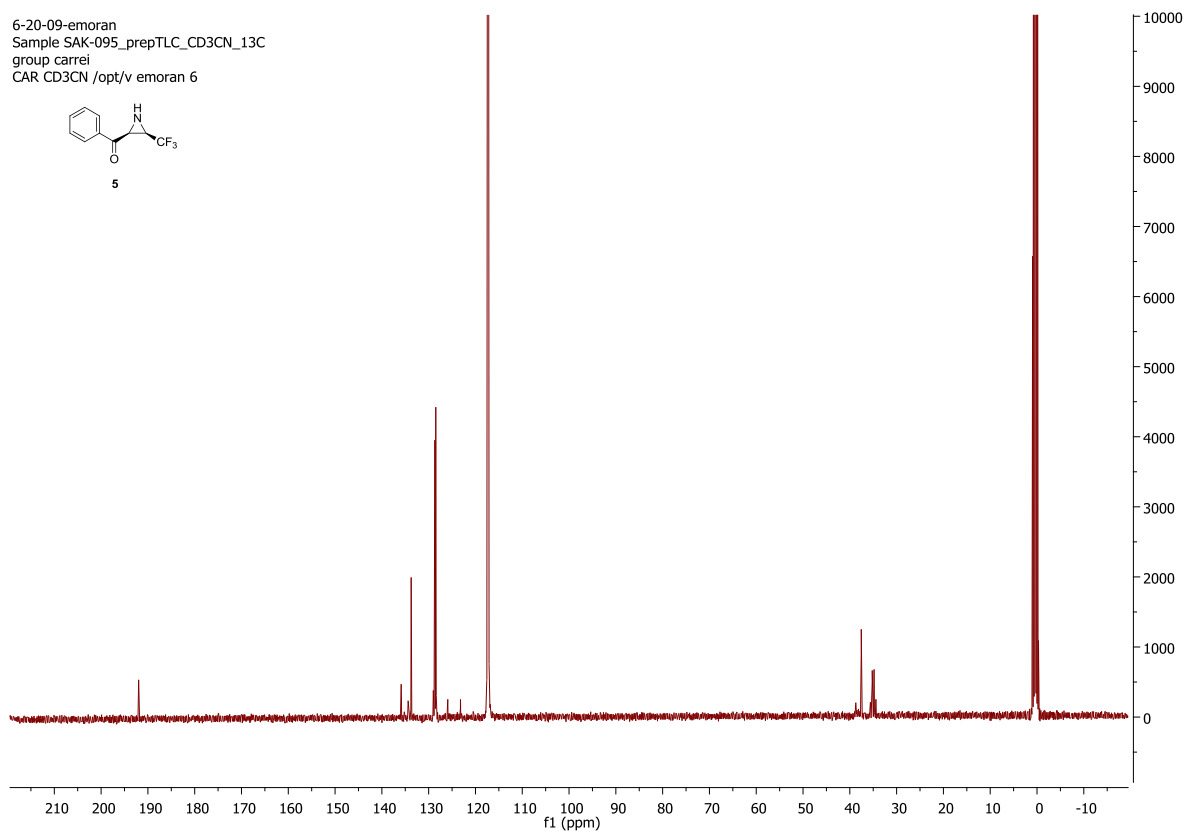

SAK-095\_prepTLC\_CD3CN\_19F  
19F OBSERVE  
STANDARD PARAMETERS

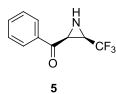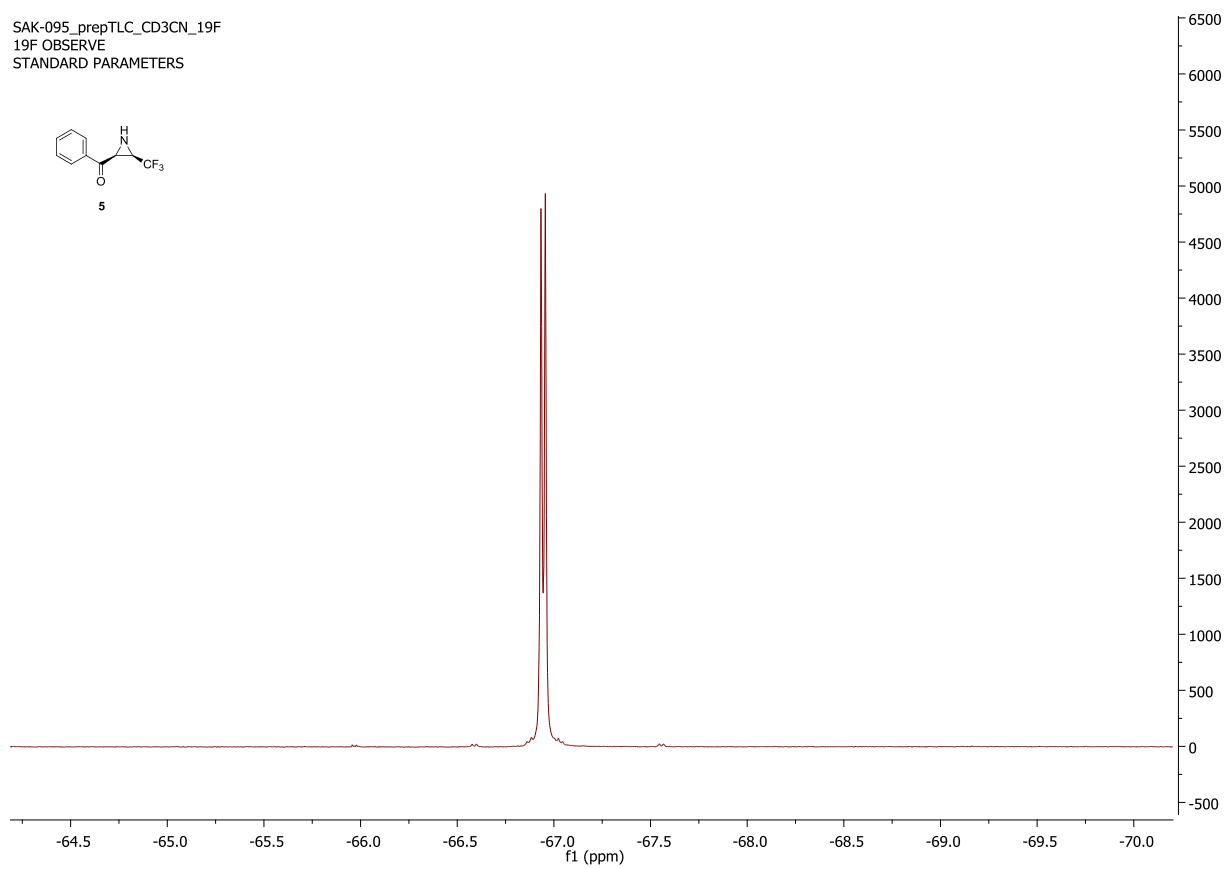

Supplement: Supplementary file 1 [file 4176832]
